# Supplementary material for: Weizmannia coagulans functions as a heat-stress protective probiotic via modulation of the pyridoxal-oxalate interaction
Source: Research Square preprint supplement (doi:10.21203/rs.3.rs-2759976/v1), 2023-05-03
Supplement: Supplementary file 1 [file 4d4b152249e8200266ac489f.xlsx]

## Sheet: READ ME
	This file contains the raw data utilized in this study. The contents of each sheet are listed below.
	Sheet name	contents
	Growth data
		1. Experimental conditions (Day0-10)
		2. Experimental conditions (Day10-21)
		3. Experimental conditions (Day21-49)
		4. Experimental conditions (Day0-49)
	Metabolomics
		1. Metabolomics raw data
		2. Correlation coefficient of metabolites (between the long intestine feces and the liver)
		3. Enrichiment analysis
		4.Feature extraction with machine learning
		5. Raw data table for structure equations and causal inference
		6. Raw signal data of immunoblotting
		7. Raw data of MDA contents
	Bacterial population
		1. Bacterial population (Detected number per 3000 reads)
		2. α-diversity
		3. β-diversity
		4. Raw data table for structure equations and causal inference

## Sheet: Growth data
	1. Experimental conditions (Day0-10)
			2015-05-15	2015-05-21	2015-05-25
	Control group	Individual No.	Day0	Day6	Day10	Increased BW	Total volume of feed intake (10 days)	Total volume of feed intake per individual	ADG	F/G
	N_control and H_control	631	38.5	117	227	188.5	1965	163.75	18.85	0.8687
		661	40.8	141	268	227.2			22.72	0.720731
		617	41.4	127.7	269.5	228.1			22.81	0.717887
		610	42.1	108.5	160.5	118.4			11.84	1.38302
		608	42.8	115.4	255	212.2			21.22	0.771678
		675	43	121.7	209.5	166.5			16.65	0.983483
		604	44.3	101.5	199	154.7			15.47	1.0585
		607	45.6	129.7	272	226.4			22.64	0.723277
		659	45.9	139.3	282.5	236.6			23.66	0.692096
		601	46.4	159.5	309.5	263.1			26.31	0.622387
		663	46.9	118.4	247	200.1			20.01	0.818341
		653	51.9	102.8	228	176.1			17.61	0.929869
		Av.	44.1333	123.542	243.958	199.825			19.9825	0.857498
		SE.	1.01476	4.91022	11.8849	11.7526			1.17526	0.0606505
	Test group	Individual No.	Day0	Day6	Day10	Increased BW	Total volume of feed intake (10 days)	Total volume of feed intake per individual	ADG	F/G
	H_coagulans	668	39.8	131.4	272.5	232.7	2640	203.07	23.27	0.872698
		652	40.5	139.7	266.5	226			22.6	0.89857
		603	41.1	102	170	128.9			12.89	1.57546
		667	41.9	150.2	318	276.1			27.61	0.735519
		664	42.5	118	253.5	211			21.1	0.96245
		649	44	146.8	308.5	264.5			26.45	0.767777
		602	45	112.3	222.5	177.5			17.75	1.1441
		665	45.4	138.6	278.5	233.1			23.31	0.871201
		671	45.8	125.8	247	201.2			20.12	1.00933
		644	46.3	149.3	314.5	268.2			26.82	0.757185
		650	46.6	147.6	273	226.4			22.64	0.896983
		662	46.6	151.1	294.5	247.9			24.79	0.819189
		656	48.5	157.7	308	259.5			25.95	0.78257
		Av.	44.1538	136.192	271.308	227.154			22.7154	0.930233
		SE.	0.759184	4.74712	11.5874	11.3436			1.13436	0.0623596
	2. Experimental conditions (Day10-21)
				2015-05-25	2015-05-29	2015-06-05
	Group	Cage	Individual No.	Day10	Day14	Day21	Total volume of feed intake (10 days) per cage	Total volume of feed intake per individual	Increased BW	ADG	F/G
	N_control	1-1	604	199	390.5	849	2545	855	650	1.31538	59.0909
			653	228	398.5	831			603	1.41791	54.8182
			601	309.5	533	1065			755.5	1.1317	68.6818
		1-2	631	227	393.5	795	2585		568	1.50528	51.6364
			663	247	474.5	960			713	1.19916	64.8182
			661	268	494.5	1020			752	1.13697	68.3636
			Av.	246.417	447.417	920				1.2844	61.2348
			SE.	15.7165	25.0428	45.1708				0.0632174	2.92699
	Group	Cage	Individual No.	Day10	Day14	Day21	Total volume of feed intake (10 days) per cage	Total volume of feed intake per individual	Increased BW	ADG	F/G
	H_control	Z1-1	610	160.5	285	650	2390	808.333	489.5	1.65134	44.5
			607	272	517.5	1060			788	1.0258	71.6364
			659	282.5	519	1020			737.5	1.09605	67.0455
		Z1-2	675	209.5	398	830	2460		620.5	1.30271	56.4091
			608	255	492	1000			745	1.08501	67.7273
			617	269.5	501	970			700.5	1.15394	63.6818
			Av.	241.5	452.083	921.667				1.21914	61.8333
			SE.	19.2895	38.1161	63.1093				0.0946148	4.04676
	Group	Cage	Individual No.	Day10	Day14	Day21	Total volume of feed intake (10 days) per cage	Total volume of feed intake per individual	Increased BW	ADG	F/G
	H_coagulans	Z5-1	602	222.5	412	840	2870	946.667	617.5	1.53306	56.1364
			662	294.5	552	1090			795.5	1.19003	72.3182
			644	314.5	568	1080			765.5	1.23666	69.5909
		Z5-2	664	253.5	452	970	2810		716.5	1.32124	65.1364
			650	273	487	980			707	1.33899	64.2727
			656	308	561	1060			752	1.25887	68.3636
			Av.	277.667	505.333	1003.33				1.31314	65.9697
			SE.	14.3867	26.5175	38.7011				0.0493461	2.30518
	3. Experimental conditions (Day21-49)
			2015-06-05	2015-06-12	2015-06-19	2015-06-26	2015-07-02
	Group	Individual No.	Day21	Day28	Day35	Day42	Day49	Total volume of feed intake per individual	Increased BW	ADG	F/G
	N_control	601	1065	1850	2620	3455	4430	5550	3365	120.179	1.64933
		661	1020	1640	2315	3025	3820	4830	2800	100	1.725
		663	960	1655	2390	3355	4250	5510	3290	117.5	1.67477
		604	849	1560	2550	3210	4260	5495	3411	121.821	1.61096
		653	831	1365	2315	2415	3230	3990	2399	85.6786	1.66319
		Av.	945	1614	2438	3092	3998	5346.25	3053	109.036	1.66465
		SE.	103.032	175.335	139.848	411.607	484.84	676.11	196.647	7.02311	0.018525
	Group	Individual No.	Day21	Day28	Day35	Day42	Day49	Total volume of feed intake per individual	Increased BW	ADG	F/G
	H_control	607	1060	1810	2660	3270	3530	4885	2470	88.2143	1.97773
		659	1020	1750	2265	2865	3570	4465	2550	91.0714	1.75098
		608	1000	1700	2445	3185	4010	5220	3010	107.5	1.73422
		617	970	1745	2435	3295	3920	4865	2950	105.357	1.64915
		675	830	1500	1890	2980	3750	4710	2920	104.286	1.61301
		Av.	976	1701	2339	3119	3756	4829	2780	99.2857	1.74502
		SE.	87.9204	118.975	287.476	188.395	210.428	275.667	111.893	3.99617	0.0636096
	Group	Individual No.	Day21	Day28	Day35	Day42	Day49	Total volume of feed intake per individual	Increased BW	ADG	F/G
	H_coagulans	662	1090	1825	2635	3320	4020	5090	2930	104.643	1.7372
		644	1080	1885	2695	3315	4080	5320	3000	107.143	1.77333
		656	1060	1770	2405	3510	4310	5245	3250	116.071	1.61385
		650	980	1635	2695	3165	3975	4995	2995	106.964	1.66778
		664	970	1655	2450	2970	4200	5175	3230	115.357	1.60217
		Av.	1036	1754	2576	3256	4117	5165	3081	110.036	1.67887
		SE.	56.8331	107.727	138.672	201.352	137.004	127.525	66.1513	2.36255	0.0335859
	4. Experimental conditions (Day0-49)
	Day10-49
	Group	Individual No.	Total volume of feed intake per individual	Increased BW	ADG	F/G
	N_control	601	6405	4120.5	103.013	1.55442
		661	5685	3552	88.8	1.60051
		663	6365	4003	100.075	1.59006
		604	6350	4061	101.525	1.56365
		653	4845	3002	75.05	1.61392
		Av.	5930	3747.7	93.6925	1.58451
		SE.	302.366	211.741	5.29352	0.0111625
	Day10-49
	Group	Individual No.	Total volume of feed intake per individual	Increased BW	ADG	F/G
	H_control	607	5693.33	3258	81.45	1.74749
		659	5273.33	3287.5	82.1875	1.60406
		608	6028.33	3755	93.875	1.60542
		617	5673.33	3650.5	91.2625	1.55413
		675	5518.33	3540.5	88.5125	1.55863
		Av.	5637.33	3498.3	87.4575	1.61394
		SE.	123.282	98.2398	2.456	0.0351026
	Day10-49
	Group	Individual No.	Total volume of feed intake per individual	Increased BW	ADG	F/G
	H_coagulans	662	6036.67	3725.5	93.1375	1.62036
		644	6266.67	3765.5	94.1375	1.66423
		656	6191.67	4002	100.05	1.54714
		650	5941.67	3702	92.55	1.60499
		664	6121.67	3946.5	98.6625	1.55116
		Av.	6111.67	3828.3	95.7075	1.59758
		SE.	57.0307	61.0763	1.52691	0.0220396
	Day0-49
	Group	Individual No.	Total volume of feed intake per individual	Increased BW	ADG	F/G
	N_control	601	6568.75	4383.6	89.4612	1.49848
		661	5848.75	3779.2	77.1265	1.54762
		663	6528.75	4203.1	85.7776	1.55332
		604	6513.75	4215.7	86.0347	1.54512
		653	5008.75	3178.1	64.8592	1.57602
		Av.	6093.75	3951.94	80.6518	1.54411
		SE.	302.366	217.675	4.44235	0.0126455
	Day0-49
	Group	Individual No.	Total volume of feed intake per individual	Increased BW	ADG	F/G
	H_control	607	5857.08	607	12.3878	1.68094
		659	5437.08	659	13.449	1.54283
		608	6192.08	608	12.4082	1.56082
		617	5837.08	617	12.5918	1.50495
		675	5682.08	675	13.7755	1.5328
		Av.	5801.08	633.2	12.9224	1.56447
		SE.	123.282	14.1365	0.2885	0.0304911
	Day0-49
	Group	Individual No.	Total volume of feed intake per individual	Increased BW	ADG	F/G
	H_coagulans	662	6239.74	662	13.5102	1.57038
		644	6469.74	644	13.1429	1.60392
		656	6394.74	656	13.3878	1.50059
		650	6144.74	650	13.2653	1.56418
		664	6324.74	664	13.551	1.52129
		Av.	6314.74	655.2	13.3714	1.55207
		SE.	57.0307	3.72022	0.0759228	0.0183971

## Sheet: Metabolomics
	1. Metabolomics raw data
	Abberivations indicate as follows: LF, long intestine feces; LV, liver; H_control, normal temperature (non-heat stress) group; H_control, Heat stress control group; H_coagulans, Heat stress test group with W. coagulans)
	Category	Metabolite_name	H_control_1	H_control_2	H_control_3	H_control_4	H_control_1	H_control_3	H_control_4	H_control_5	H_coagulans_1	H_coagulans_2	H_coagulans_3	H_coagulans_4
	Others	LF_1_Hexadecanol	0	0	0	0	0	0	0	0	0	0	0	0
	Others	LF_1_5_Anhydro_glucitol	0	0	0	0	0	0	0	0	0	0	0	0
	Others	LF_1_6_Anhydroglucose	0.269854	0.402454	0.803831	0.103048	0	0	0	0	0	0	0	0
	Others	LF_2_Aminoadipic_acid	0	0	0	0	0.04065	0.032016	0.0873087	0.145142	0.0688126	0.0516816	0.127313	0.0399168
	Others	LF_2_Aminoethanol	6.21781	14.0269	6.09141	3.24301	2.56013	2.01275	2.32001	3.54985	3.98785	1.99926	9.57202	2.9137
	Others	LF_2_Aminoisobutyric_acid	0	0	0	0	0.127599	0.118342	0.282484	0.150241	0.135113	0.133352	0.115805	0.159554
	Others	LF_2_Aminooctanoic_acid	0	0	0	0	0	0	0	0	0	0	0	0
	Others	LF_2_Aminopimelic_acid	0.927532	0.0526797	0.0591396	0.0396894	0.0179474	0.065253	0.0735971	0.126183	0.424415	0.10827	0.693742	0.142764
	Others	LF_2_Deoxy_glucose	0	0	0	0	0	0	0	0	0	0	0	0
	Others	LF_2_Hydroxybutyric_acid	0.408108	1.36803	1.45445	0.703036	1.3499	0.65149	2.66243	1.03297	1.68199	1.34165	1.02198	0.881529
	Others	LF_2_Hydroxyglutaric_acid	0.0918675	0.763336	1.25913	0.485692	0.414319	0.181064	0.200156	0.432805	0.0500029	0.171616	0.388233	0.0576468
	Others	LF_2_Hydroxyhippuric_acid	0	0	0	0	0	0	0	0.003258	0	0	0.00298294	0
	Others	LF_2_Hydroxyisobutyric_acid	0.0451972	0.152863	0.0990636	0.0527661	0.189774	0.185777	0.347277	0.119948	0.0399744	0.059718	0.0459024	0.114552
	Others	LF_2_Hydroxyisocaproic_acid	0.741354	6.12422	1.57673	1.57696	2.67884	2.01303	3.92764	1.02662	0.220247	0.568798	0.460545	0.906309
	Others	LF_2_Hydroxyisovaleric_acid	0.131062	1.59148	0.656689	0.501329	0.920592	0.415544	1.14687	0.315607	0.0362955	0.367028	0.146484	0.114407
	Others	LF_2_Isopropylmalic_acid	0	0	0	0	0.0283019	0.03	0.0272727	0.0272727	0.0283019	0.03	0.0294118	0.03
	Others	LF_2_Keto_isovaleric_acid	0	0	0	0	0	0	0.148279	0.249927	0	0.113953	0.102695	0
	Others	LF_2_Ketoadipic_acid_oxime	0	0	0	0	0	0	0	0	0	0	0	0
	Others	LF_2_Ketobutyric_acid	0.167192	4.45694	1.33635	_0.166025555555556	0.153857	0.144074	0.374139	0.382689	0.100901	0.16853	0.14765	0.136867
	Others	LF_2_Ketoglutaric_acid	0.150941	0	0.449814	0.0691486	0.0184879	0.011112	0.0350774	0.852449	0.0644915	0.0414441	0.454993	0.0259872
	Others	LF_2_Ketoisocaproic_acid	0.598018	0.471899	3.04844	0.419039	0.114085	0.307465	0.438997	1.17846	0.39996	0.220117	0.293988	0.138436
	Others	LF_2_Methyl_3_hydroxybutyric_acid	0	0	0	0	0	0	0	0	0	0	0	0
	Others	LF_2_Methylhippuric_acid	0	0	0	0	0	0	0	0	0	0	0	0
	Others	LF_2_Phosphoglyceric_acid_	0	0	0	0	0	0	0	0	0	0	0	0
	Others	LF_2_Propyl_3_hydroxy_pentanoic_acid	0	0	0	0	0	0	0	0	0	0	0	0
	Others	LF_2_Propyl_glutaric_acid	0	0	0	0	0	0	0	0	0	0	0	0
	Others	LF_2_3_Bisphosphoglyceric_acid	0	0	0	0	0	0	0	0	0	0	0	0
	Others	LF_2_Deoxyuridine	0	0	0	0	0	0	0	0	0	0	0	0
	Others	LF_3_Aminoglutaric_acid	66.3067	16.5898	81.2473	59.0487	12.2162	25.1061	7.82851	55.051	32.8988	2.54655	61.2634	4.85965
	Others	LF_3_Aminoisobutyric_acid	0.081365	0.192218	0.141634	0.0761853	0.0388443	0.0405822	0.10807	0.0482446	0.0209205	0.0626694	0.0420953	0.0373032
	Others	LF_3_Aminopropanoic_acid	4.36395	7.9195	5.54874	3.71099	3.27038	2.72739	3.74209	3.59189	2.28401	1.52591	3.30794	2.1228
	Others	LF_3_Dehydroshikimic_acid	0	0	0	0	0	0	0	0	0	0	0	0
	Others	LF_3_Hydroxy_3_methylglutaric_acid	0	0	0	0	0.045169	0.0470397	0.225828	0.0891205	0.014614	0.150936	0.071995	0.0271185
	Others	LF_3_Hydroxy_kynurenine	0	0	0	0	0	0	0	0	0	0	0	0
	Others	LF_3_Hydroxyanthranilic_acid	0	0	0	0	0	0	0.0122236	0	0	0.0092544	0	0
	Others	LF_3_Hydroxybutyric_acid	0.857542	4.69718	1.37014	0.966025	4.9789	3.04746	2.1746	4.24026	0.733134	1.22625	0.750303	2.30832
	Others	LF_3_Hydroxyglutaric_acid	0.0514991	0.0744914	0.0935436	0.0140403	1.25945	1.30402	1.15149	1.19045	1.22639	1.29975	1.29087	1.27557
	Others	LF_3_Hydroxyisobutyric_acid	0.211789	1.14939	0.418935	0.24339	1.54983	0.722804	0.877594	0.994597	0.195772	0.296841	0.213585	0.51582
	Others	LF_3_Hydroxyisovaleric_acid	0	0	0	0	36.1549	7.09563	23.3011	18.5172	3.59209	10.2457	5.53219	4.47533
	Others	LF_3_Hydroxyphenylacetic_acid	0	0	0	0	0.012116	0	0.112731	0.0502544	0	0.0485073	0.01878	0
	Others	LF_3_Hydroxypropionic_acid	0.551865	25.7462	2.67859	3.02724	8.59503	7.64184	9.11806	8.30272	0.882497	1.56886	1.65332	4.55257
	Others	LF_3_Hydroxypyruvic_acid	0	0	0	0	0	0	0	0	0	0	0	0
	Others	LF_3_Methoxy_4_hydroxybenzoic_acid	1.73235	1.57191	1.60799	0.572284	0.516647	0.648068	0.970925	0.698535	0.603507	0.675995	0.995657	0.846971
	Others	LF_3_Methyl_2_oxovaleric_acid	0	0	2.55649	0	0.0778619	0.0975192	0.421362	0.717149	0.0482652	0.129458	0.188012	0.0782154
	Others	LF_3_Methyladipic_acid	0	0	0	0	0.152629	0.053463	0.610412	0.46009	0.0832293	0.487955	0.403927	0.069915
	Others	LF_3_Methylcrotonoylglycine	0	0	0	0	0	0	0	0	0	0	0	0
	Others	LF_3_Methylglutaric_acid	0	0	0	0	0	0	0	0	0	0	0	0
	Others	LF_3_Phenyllactic_acid	0.792034	2.85461	0.732682	0.797308	1.33201	1.54233	2.69045	0.65254	0.312844	0.430189	0.387837	0.713166
	Others	LF_3_Phosphoglyceric_acid	0	0	0	0	0	0	0	0	0	0	0.0240282	0
	Others	LF_3_Sulfinoalanine	0	0	0	0.218069	0	0.0702018	0	0.364956	0.240435	0	0.844418	0.0394911
	Others	LF_3_4_Dihydroxybenzylamine	0	0	0	0	0	0	0	0	0	0	0	0
	Others	LF_4_Aminobenzoic_acid	0	0	0	0	0.0122024	0.0150849	0.0711567	0.0472481	0.00634868	0.0886908	0.0243803	0.0122565
	Others	LF_4_Aminobutyric_acid	1.45002	49.0123	4.07147	3.05863	1.20435	0.781751	0.696186	0.592346	0.299708	0.352825	0.602072	0.386341
	Others	LF_4_Hydroxybenzoic_acid	0.445547	0.44684	0.951488	0.220359	0.213323	0.170672	0.745801	0.294164	0.0764377	0.471501	0.122992	0.183028
	Others	LF_4_Hydroxyphenyllactic_acid	0.20953	1.62014	0.380862	0.224048	0.562982	0.487323	0.761601	0.225544	0.0858858	0.162745	0.160479	0.204642
	Others	LF_4_Hydroxyphenylpyruvic_acid	1.48308	2.03232	0.276281	0.221538	0.259662	0.903526	0.547014	0.221134	0.45196	0.2585	1.15619	0.879936
	Others	LF_4_Hydroxyproline	195.818	131.958	207.781	135.46	1.09706	1.00629	1.80589	2.53914	1.73329	0.314385	2.55927	0.753299
	Others	LF_5_Aminolevulinic_acid	0	0	0	0	2.60372	2.33003	0	11.8011	3.81965	0.494372	18.7344	2.0231
	Others	LF_5_Aminovaleric_acid	2.02111	1.71003	16.2062	2.77572	9.05926	1.24267	14.6035	10.8752	0.423433	6.12041	0.740113	0.235787
	Others	LF_5_Dehydroquinic_acid	0	0	0.286447	0	0.0617822	0	0.0630027	0.0335149	0.0127109	0.159253	0.123328	0.0818877
	Others	LF_5_Hydroxy_tryptophan	0	0	0	0	0	0	0	0	0	0	0	0
	Others	LF_5_Hydroxymethyl_2_furoic_acid	0	0	0	0	0	0	0	0	0	0	0	0
	Others	LF_5_Methoxytryptamine	0.115003	0.133429	0.159411	0.0308719	0.0716015	0.0438867	0.126994	0.0288387	0.028526	0.0997266	0.0238076	0.035148
	Others	LF_5_Oxoproline	22.7811	12.8918	27.5425	16.8373	9.78568	12.6183	7.36899	19.7349	15.7836	3.14901	21.9567	7.55467
	Others	LF_5_Methylthioadenosine	0	0	0	0	0	0	0	0	0	0	0	0
	Others	LF_6_Phosphogluconic_acid	0	0	0	0	0	0	0	0	0	0	0	0
	Others	LF_7_Methylguanine	0	0	0	0	0.00412075	0.0062376	0	0.00568418	0.0109625	0	0.0116215	0.0119292
	Others	LF_Acetoacetic_acid_oxime	0	0	0	0	0	0	0	0	0	0	0	0
	Others	LF_Acetylglycine	0.451465	1.07009	1.05985	0.547542	1.29512	1.5772	1.85608	2.63099	0.736535	0.23975	0.626791	0.732571
	Others	LF_Aconitic_acid	0	0	0	0	0	0	0	0	0	0	0	0
	Others	LF_Adenine	0.149882	0.832054	0.330107	0.195999	0.509279	0.552522	0.754627	0.41105	0.141865	0.169118	0.146758	0.243191
	Others	LF_Adenosine	0	0.0303436	0.0325065	0	0.0568588	0.0272451	0.0671157	0.0639693	0.0128536	0.0954363	0.0604203	0.0323931
	Others	LF_Adenosine_3_5_cyclic_monophosphate	0	0	0	0	0	0	0	0	0	0	0	0
	Others	LF_Adenosine_monophosphate	0	0	0	0	0	0	0	0	0	0	0	0
	Others	LF_Adipic_acid	0	0	0	0	0.0630037	0.050586	0.0980084	0.11875	0.0251621	0.0807867	0.051545	0.0280161
	Amino_acid	LF_Alanine	556.676	498.423	883.707	373.41	116.696	101.602	122.001	144.892	114.511	48.3498	131.9	54.6667
	Others	LF_Allantoin	0.328933	0	0	0	0.360837	0.591363	0.298959	0.143711	0.132834	0.158953	0.152045	0.266133
	Carbohydrate	LF_Allose	41.7263	27.7134	115.497	3.54922	0	0	0	0	0	0	0	0
	Others	LF_Anthranilic_acid	0	0	0	0	0	0	0	0	0	0	0	0
	Others	LF_Arabinose	1.48142	0.18298	4.67361	0.140442	0.741376	0.416112	11.4737	0.688999	0.456563	7.18828	1.36263	0.448579
	Carbohydrate	LF_Arabitol	0.835619	1.67888	0.996185	0.269058	0.523724	0.437051	0.502102	0.107888	0.623345	0.316667	0.705509	0.503766
	Others	LF_Arachidonic_acid	0	0	0	0	0	0	0	0	0	0	0	0
	Amino_acid	LF_Arginine	12.7372	6.3524	12.8552	7.7015	2.98427	2.89171	3.22713	4.29531	2.74653	0.818486	3.13494	1.84274
	Others	LF_Ascorbic_acid	0	0	0	0	0.589927	0.501899	0	0.809276	0.690314	0.713684	1.63299	1.06492
	Amino_acid	LF_Asparagine	31.9789	3.80924	12.4473	7.16199	5.5443	35.5078	6.40431	45.9333	46.1811	0.625425	44.6675	3.62372
	Amino_acid	LF_Aspartic_acid	65.6858	16.6458	80.494	58.3135	12.1388	24.9076	7.79838	54.6486	32.6103	2.53806	62.0545	4.80609
	Others	LF_Azelaic_acid	0	0	0.203684	0	0.0669719	0.0827259	0.154835	0.274021	0.0969359	0.139144	0.126616	0.0807168
	Others	LF_Batyl_alcohol	7.37987	26.7608	83.4788	4.88978	0	0.308338	2.92381	0.595707	1.66644	0	3.0383	2.3947
	Others	LF_Benzoic_acid	0.560397	0.625587	0.314912	0.141354	0.304013	0.253755	1.20718	0.762327	0.171494	0.862018	0.269239	0.26069
	Others	LF_Biotin	0	0	0	0	0	0	0	0	0	0	0	0
	Others	LF_Cadaverine	1.6765	38.5855	3.99017	1.05076	0.0366753	0.0689373	0.0334955	0.0690627	0.0841288	0.0228798	0.0744909	0.0296106
	Others	LF_Caproic_acid	1.99904	4.17413	13.3591	0.641318	4.72907	2.92157	18.6728	9.77243	3.82285	12.0421	5.09769	3.00791
	Others	LF_Carnosine	0	0	0	0	0	0	0	0	0	0	0	0
	Others	LF_Catechol	0.113324	0.147632	0.152356	0.125549	0.0748073	0.0284124	0.341121	0.265799	0.0065434	1.07896	0.0508303	0.0105183
	Carbohydrate	LF_Cellobiose	6.82614	18.8891	70.9523	4.46085	0	0	0	0.973087	0	0	1.01512	0.891785
	Others	LF_Cholecalciferol	0	0	0	0	0	0	0	0	0	0	0	0
	Others	LF_Cholesterol	0	0	0	0	0	0	0	0	0	0	0	0
	Others	LF_Citramalic_acid	0	0	0.11629	0	0.0285787	0.0104355	0.0452231	0.0584348	0.00564368	0.109158	0.0429265	0.0067584
	Others	LF_Citric_acid	2.52343	0.348634	0.209947	0.180458	0.0524675	0.283227	0.382028	0.294742	0.848006	0.2902	1.35294	0.353113
	Others	LF_Citrulline	0	0	0	0	0	0.17759	0	0.514648	0	0	0	0
	Others	LF_Coniferyl_alcohol	0	0	0	0	0	0	0	0	0	0	0	0
	Others	LF_Coniferyl_aldehyde	0	0	0	0	0	0	0	0	0	0	0	0
	Others	LF_Creatinine	1.51571	4.13681	4.22879	2.86345	1.91245	0.849008	1.81989	3.27158	0.888471	0.963445	1.92864	1.16524
	Others	LF_Cystamine	0.158812	0.0829612	0.251216	0.136104	0	0	0	0	0	0	0	0
	Others	LF_Cystathionine	0	0	0	0	0	0	0	0	0	0	0	0
	Others	LF_Cysteic_acid	0	0	0	0	0	0	0	0	0	0	0	0
	Amino_acid	LF_Cysteine	4.17487	5.39625	11.8658	23.605	2.58034	2.52683	2.13598	2.4349	1.62752	0.452578	3.30243	1.96485
	Others	LF_Cystine	0.386242	0	0.291078	0.282659	0.0587774	0.164529	0	0	0	0	0	0
	Others	LF_Cytidine	10.3703	0	2.56744	0	0	0	0	0	17.5793	3.13899	21.3831	13.6697
	Others	LF_Cytosine	0.473096	0.954098	1.22731	0.465869	0.199924	0.374879	0.170518	0.418604	0.165995	0.122974	0.342539	0.2879
	Others	LF_Decanoic_acid	0.0588894	0.0762678	0.025239	_0.00310055555555555	0.469072	0.442709	1.17235	0.841253	0.923883	0.641888	0.686546	0.37766
	Others	LF_Dihydroorotic_acid	0	0	0	0	0	0	0	0	0	0	0	0
	Others	LF_Dihydrouracil	0	0	0	0	0	0	0	0	0	0	0	0
	Others	LF_Dihydroxyacetone	0.512949	0.693306	0.342363	0.240577	0.300766	0.268669	0.675978	0.169289	0.215984	0.0495102	0.397771	0.159327
	Others	LF_Dihydroxyacetone_phosphate	3.95978	3.46905	9.29057	7.15908	6.35455	3.96479	1.39369	3.0669	2.85862	1.87184	5.33666	2.53652
	Others	LF_Dimethylglycine	0.282046	0.491533	0.640192	0.161132	0.315893	0.260723	0.345439	0.400186	0.319531	0.20174	0.389818	0.217252
	Others	LF_Docosahexaenoic_acid	0	0	0	0	0	0	0	0	0	0	0	0
	Others	LF_Dodecanedioic_acid	0	0	0	0	0	0	0	0.0530558	0	0	0	0
	Others	LF_Dopa	0	0	0	0	0	0	0	0	0	0	0	0
	Others	LF_Dopamine	0	0	0	0	0.00247274	0.0031695	0.0148617	0.020562	0.00719292	0.0177669	0.00896912	0.0057789
	Others	LF_Eicosapentaenoic_acid	0	0	0	0	0	0	0	0	0	0	0	0
	Others	LF_Elaidic_acid	0	0	0	0	0	0	0	0	0	0	0	0
	Others	LF_Epinephrine	0	0	0	0	0	0	0	0	0	0	0	0
	Others	LF_Erythrose_4_phosphate	0	0	0	0	0	0	0	0	0	0	0	0
	Carbohydrate	LF_Erythrulose	0	0	0	0	4.76907	4.18324	8.5345	4.40101	3.50539	4.0491	3.36505	3.31551
	Others	LF_Ethylmalonic_acid	0	0	0	0	0	0	0	0.0141526	0	0.0361824	0	0
	Others	LF_Fendiline	0	0	0	0	0	0	0	0	0	0	0	0
	Carbohydrate	LF_Fructose	10.9525	0.28064	15.313	0.140365	0.0869225	0.0407286	0.254831	0.150998	1.48889	14.1051	5.6411	7.93541
	Others	LF_Fructose_1_phosphate	0	0	0	0	14.5208	9.20673	5.24225	11.2375	6.4267	33.6659	44.8903	31.2843
	Others	LF_Fructose_6_phosphate	0	0	0	0	10.4647	4.60392	5.2256	9.12064	4.84356	27.9865	34.7341	24.9553
	Carbohydrate	LF_Fucose	1.63895	0.757369	13.0058	1.26415	3.34829	2.54761	9.32306	10.6756	0.345182	10.1404	1.95577	1.07417
	Others	LF_Fumaric_acid	1.60865	1.59295	3.50667	2.80479	0.221073	0.274983	0.212931	2.12344	0.763394	0.14774	1.08877	0.607425
	Carbohydrate	LF_Galactitol	1.76022	0.880511	1.92998	0.625526	0.427774	0.404169	0.613247	0.593888	0.44086	0.106868	0.438957	0.182796
	Others	LF_Galactosamine	0	0	0	0	0.121071	0	0.0918766	0.0729731	0.125326	1.10826	0.487976	0.51329
	Carbohydrate	LF_Galactose	53.9001	0.419019	94.7796	1.63287	1.58139	1.73022	19.7765	4.20916	28.6064	72.9104	42.782	70.6204
	Others	LF_Galacturonic_acid	0	0	0	0	0	0.758254	0.329512	0.159992	0	0.259527	0	0.600824
	Others	LF_Glucaric_acid	3.57162	0.388843	0.499325	0.534729	0.332915	0.609726	0.41957	0.138327	3.20957	1.24782	3.35351	2.55514
	Others	LF_Gluconic_acid	2.92236	0.182007	0.348802	0.245695	0.0385455	0.0688398	0.112361	0.283156	0.505385	0.0690555	1.18174	0.586392
	Others	LF_Glucono_1_4_lactone	0	0	0	0	0	0	0	0	0	0	0	0
	Others	LF_Glucono_1_5_lactone	31.4505	56.7612	129.165	6.39611	17.0476	2.44421	16.1405	10.529	4.73141	34.0142	29.2055	18.861
	Carbohydrate	LF_Glucosamine	0.341576	0.213826	0.50731	0.13216	0.106835	0.0768927	0.223683	0.155325	0.220707	0.194046	0.444191	0.328922
	Carbohydrate	LF_Glucose	32.1877	57.6617	131.564	6.5431	17.3739	2.50658	15.7157	11.032	5.37847	34.0432	29.3995	19.355
	Others	LF_Glucose_6_phosphate	0.122746	0	1.92623	0.480184	0.233072	0.126954	0.120194	0.212197	0.122701	0.673081	0.798848	0.620139
	Others	LF_Glucuronic_acid	2.84378	4.70961	0.359599	0.2907	0.260176	2.05045	0.984611	0.39241	0.304769	0.115449	2.53662	1.99468
	Others	LF_Glutaconic_acid	0	0	0	0	0	0	0	0	0	0	0	0
	Amino_acid	LF_Glutamic_acid	131.664	35.4473	139.296	91.7658	88.5001	115.286	44.9474	156.215	105.218	16.9963	142.212	29.661
	Others	LF_Glutamic_acid_5_methylester	0	0	0	0	15.0695	25.8986	8.20138	56.5519	31.6659	3.16363	63.6228	5.39472
	Amino_acid	LF_Glutamine	0	0	0	0	1.37139	1.16478	4.21066	4.82539	0.107337	4.61839	0.862164	0.34324
	Others	LF_Glutaric_acid	0	0	0.822646	0.108241	0.140089	0.038862	0.457837	0.288441	0.0303396	0.190793	0.159189	0.0250779
	Others	LF_Glyceraldehyde	13.4335	76.5393	29.243	0	0.981044	1.12147	2.3939	0.590056	0.143071	0.158807	0.159375	0.694639
	Others	LF_Glyceraldehyde_3_phosphate	0	0	0	0	0	0	0	0	0	0	0	0
	Others	LF_Glyceric_acid	1.10332	2.91655	1.6348	1.07651	0.723179	0.628202	0.739113	1.40824	0.769808	0.236054	1.54282	0.454081
	Others	LF_Glycerol	158.984	487.062	492.666	270.469	5.25853	3.62098	7.06405	7.45885	8.86069	4.19766	12.6131	4.30955
	Others	LF_Glycerol_2_phosphate	0.053345	0	0.0985905	0.0618736	0.138144	0.117288	0.0423854	0.0560836	0.0412265	0.0256311	0.068015	0.0347073
	Others	LF_Glycerol_3_phosphate	0.718453	0.69159	1.84989	1.48124	2.52479	1.50459	0.550654	1.25394	1.11285	0.766108	2.11538	0.955122
	Amino_acid	LF_Glycine	167.205	140.874	203.993	131.029	53.0827	54.5208	56.965	67.6014	54.1994	15.6379	65.7283	38.9366
	Others	LF_Glycolic_acid	0.408596	0.781975	1.10637	0.272257	0.498177	0.323451	1.15386	0.727862	0.272915	0.635409	0.385535	0.257322
	Others	LF_Glycyl_Glycine	1.67285	38.7674	3.9658	1.04387	0.0343421	0.0733266	0.0421906	0.0668043	0.0853724	0.0262083	0.074615	0.0240849
	Others	LF_Glyoxylic_acid	0.39933	0.563885	0.793594	0.269714	0.279857	0.222536	0.361637	0.386672	0.301503	0.205205	0.376488	0.22486
	Others	LF_Guanine	0.116096	0.112164	0.141716	0.0702094	0.142212	0.451787	0.116423	0.122703	0.077359	0.0380652	0.0866785	0.114088
	Others	LF_Guanosine	0	0	0	0	0	0	0	0	0.020053	0	0.117878	0.023253
	Others	LF_Hexanoylglycine	0	0	0	0	0	0	0	0	0	0	0	0
	Others	LF_Hippuric_acid	0	0	0	0	0.109953	0.102866	0.626748	0.586	0.310586	1.71612	0.544409	0.180753
	Others	LF_Histamine	0.187367	4.17902	0.406167	0	0.207174	0.11109	0	0.317029	0	0.183008	0.245987	0.347271
	Amino_acid	LF_Histidine	15.4203	1.42349	15.6305	13.6543	0.146518	1.87633	0.0556175	7.27498	4.97439	0.0093276	5.92552	0.0737361
	Others	LF_Histidinol	0	0	0	0	0	0	0	0	0	0	0	0
	Others	LF_Homocysteine	0	0	0	0	0.0561546	0.0557079	0.0956896	0.247691	0.185592	0.0433356	0.286591	0.0394005
	Others	LF_Homogentisic_acid	0	0	0	0	0	0	0	0	0	0	0	0
	Others	LF_Homoserine	0	0	0.820907	0.2667	0.149458	0.0406251	0.287237	0.150497	0.0466616	0.276802	0.0744271	0.0427689
	Others	LF_Homovanillic_acid	0	0	0	0	0	0	0	0	0	0	0	0
	Others	LF_Hydroquinone	0.0444147	0.0956155	0.0565158	0.0243692	0.00727189	0.0032286	0.0121276	0.0132859	0.00504623	0.0243288	0.0112859	0.0153432
	Others	LF_Hydroxylamine	_37.7168653125	43.2902	_32.146839	_45.2362313888889	12.5115	12.0118	24.674	2.57139	10.3863	9.79252	4.318	4.00524
	Others	LF_Hypotaurine	1.31976	1.13264	2.85655	1.64248	2.44184	1.49003	1.3962	1.62674	0.782664	0.350011	1.89328	0.465339
	Others	LF_Hypoxanthine	_0.45484	_0.37001798076923	1.60068	2.59684	2.48342	2.74193	1.20997	3.53831	1.68406	0.989911	4.54898	1.27784
	Others	LF_Indol_3_acetic_acid	0.229378	0.126319	0.405809	0.190502	0.16624	0.0937266	0.777027	1.31743	0.116645	0.642327	0.334401	0.129905
	Others	LF_Inosine	0	0	0	0	0.0401584	0.0539931	0.0362768	0.0440095	0.163361	0.110607	0.521586	0.172843
	Others	LF_Inosine_monophosphate	0	0	0	0	0	0	0	0	0	0	0	0
	Others	LF_Inositol	29.0216	52.4282	51.087	35.629	42.3712	36.3002	55.0738	30.8684	18.9344	19.4193	34.2173	20.0662
	Others	LF_Inositol_phosphate	0	0	0	0	0	0	0	0	0	0	0	0
	Others	LF_Isobutyrylglycine	0	0	0	0	0	0	0	0	0	0	0	0
	Others	LF_Isocitric_acid	4.48045	5.16826	1.96647	1.24154	0.782967	3.99771	6.06469	1.30386	3.03273	2.96413	3.49307	2.85024
	Amino_acid	LF_Isoleucine	36.834	24.6526	28.1469	11.6016	8.31026	14.1908	21.1448	14.8874	19.9225	4.22863	20.7391	10.6559
	Others	LF_Isomaltose	0	0	0	0	0	0	0	0	0	0	0	0
	Others	LF_Isovalerylglycine	0	0	0	0	0	0	0	0	0	0	0	0
	Others	LF_Juniperic_acid	0	0	0	0	0	0	0	0	0	0	0	0
	Others	LF_Kynurenic_acid	0	0	0	0	0	0	0	0	0	0	0	0
	Others	LF_Kynurenine	0	0	0	0	0.0605414	0.0429156	0.0576175	0.0295162	0.0533542	0.0577479	0.0618424	0.0439005
	Others	LF_Lactic_acid	369.402	1358.33	474.677	371.562	378.171	380.15	708.855	293.794	169.787	179.744	169.079	333.918
	Carbohydrate	LF_Lactitol	0.701484	0.0519545	0.092349	0.0226689	0.0582461	0.0081579	0.0860392	0.0119405	0.113029	0.154504	0.185188	0.189151
	Others	LF_Lactose	_0.269819375	_0.249064038461538	_0.2590266	_0.239839444444444	3.17777	0.533796	12.2938	0.845948	0.485626	4.40528	0.812416	0
	Others	LF_Lactulose	0	0	0	0	0	0	0	0	0	0	0	0
	Others	LF_Lauric_acid	13.343	11.3882	3.29208	1.95709	3.77374	2.23381	13.0359	11.6507	51.4436	8.92728	12.0796	7.59409
	Amino_acid	LF_Leucine	199.143	103.244	231.171	102.303	27.9592	38.854	25.0411	48.3322	41.0113	4.92134	47.2146	15.8776
	Others	LF_Linoleic_acid	0	0	0	0	11.8819	0	12.8746	17.4832	124.57	11.4946	19.7049	0
	Others	LF_Lipoic_acid	0	0	0	0	0	0	0	0	0	0	0	0
	Amino_acid	LF_Lysine	121.899	46.6325	136.634	54.1276	38.5604	37.3321	54.8183	61.1937	35.3706	4.88693	30.4175	8.18402
	Carbohydrate	LF_Lyxose	0.616531	0.656669	1.52974	0.117211	0	0	0	0	0	0	0	0
	Others	LF_Maleic_acid	0	0	0	0	0	7.06583	0	76.1309	65.4969	9.75001	144.729	22.881
	Others	LF_Malic_acid	3.6136	2.58051	11.569	8.15905	0.705293	1.13366	0.385746	9.87646	1.35692	0.191809	3.19957	0.936839
	Others	LF_Malonic_acid	2.84612	0	1.87073	0.902024	0.0924345	0.774614	1.17129	1.11961	6.09551	1.55955	7.87113	1.4823
	Carbohydrate	LF_Maltitol	0	0	0	0	0	0	0	0	1.33249	0.484224	1.5395	0.900584
	Carbohydrate	LF_Maltose	2.48569	8.13783	27.2472	1.4826	37.6697	1.71664	23.1627	1.60875	1.78599	31.6373	0.495026	4.79532
	Carbohydrate	LF_Mannitol	0.150621	0.0724486	7.87571	0.0626622	0	0	0	0	13.4723	9.79703	21.926	21.0548
	Carbohydrate	LF_Mannose	0	0	0	0	0	0	0	0	0	0	0	0
	Others	LF_Mannose_6_phosphate	0	0	0	0	18.3739	13.4736	7.8239	14.3108	6.75203	42.7021	56.19	41.6112
	Others	LF_Margaric_acid	0	0	0	0	8.54131	8.49015	16.8992	10.102	7.64254	7.89383	6.39906	7.33536
	Others	LF_Melatonin	0	0	0	0	0	0	0	0	0	0	0	0
	Others	LF_Mesaconic_acid	0	0	0	0	0.00533972	0	0.00775827	0.0102725	0.00426396	0.0077865	0.00768265	0.0045834
	Carbohydrate	LF_meso_Erythritol	0.414964	1.38318	0.53129	0.32667	0.551701	0.565409	0.747526	0.166533	0.66648	0.538422	0.361047	0.806013
	Amino_acid	LF_Methionine	28.5936	15.7837	48.8765	22.1281	7.69287	9.90047	6.39281	19.2706	15.3337	1.66989	22.741	3.82272
	Others	LF_Methionine_sulfone	0	0	0	0	0	0	0	0	0	0	0	0
	Others	LF_Methoprene_acid	0	0	0	0	0	0	0	0	0	0	0	0
	Others	LF_Methylmalonic_acid	1.44534	0.799891	1.91509	0.778256	0.390718	0.585466	0.644389	1.12795	0.972479	0.125573	1.34684	0.201542
	Others	LF_Methylsuccinic_acid	0	0	0.46173	0.266834	0.174538	0.0173307	0.521534	0.481545	0.0494295	0.232025	0.282657	0.0394332
	Others	LF_Metoprolol	0	0	0	0	0	0	0	0	0	0	0	0
	Others	LF_Mevalonic_lactone	0	0	0	0	0	0	0	0	0	0	0	0
	Others	LF_Monostearin	0	0	0	0	0	0	0	0	0	0	0	0
	Others	LF_Myristic_acid	7.75953	18.3993	6.62799	_1.39206472222222	6.43065	5.07989	13.9119	10.9514	18.2121	6.06224	7.82435	7.14132
	Others	LF_N_Acetyl_Lysine	0	0	0	0	0	0	0	0	0	0	0	0
	Others	LF_N_Acetyl_Ornithine	0	0	0	0	0	0	0	0	0	0	0	0
	Others	LF_N_Acetylaspartic_acid	0	0	0	0	0	0	0	0	0	0	0	0
	Others	LF_N_Acetylglutamine	0	0	0	0	0	0.0137478	0	0.0417344	0.0066133	0	0.0190565	0
	Others	LF_N_Acetylmannosamine	5.02254	9.3579	8.75496	6.02611	0	0	1.90241	2.44271	0.159421	2.8716	1.44718	1.00913
	Others	LF_N_Acetylneuraminic_acid	0.263382	0	0.577844	0.122151	0.292283	0.614505	0.180277	1.7896	0.0523047	0.536532	1.23467	0.116523
	Others	LF_N_Acetylserine	0.267694	1.12216	0.42749	0.458242	1.34858	1.9133	1.66581	4.03045	0.476199	0.11471	0.458839	0.505252
	Others	LF_N_Acetyltyrosine	0	0	0	0	0.00581038	0.0089763	0	0.0250702	0.00946387	0.0052164	0.0191744	0.0062682
	Others	LF_N_Butyrylglycine	0	0	0	0	0	0	0	0	0	0	0	0
	Others	LF_N6_Acetyllysine	0.0309203	0	0.0903954	0.0615619	0.0154514	0.0136284	0.00540709	0.107743	0.0530479	0.0035145	0.117637	0.0046677
	Others	LF_Niacinamide	0.0375241	0.111061	0.0582558	0.0450294	0.125779	0.106117	0.0887313	0.0918046	0.0493084	0.0621255	0.157377	0.0653454
	Others	LF_Nicotinic_acid	1.77348	3.3993	3.45214	2.4354	2.09218	1.22125	3.78185	3.23534	1.14631	1.75461	2.10626	1.13489
	Others	LF_Nonanoic_acid	0.785396	1.89283	0.6686	0.132489	0.418959	0.338724	0.903572	0.422272	0.429692	0.509949	0.340261	0.34376
	Others	LF_Norepinephrine	0	0	0	0	0.000826981	0.0013017	0.00566182	0.00398591	0.00250811	0	0.00411647	0.0011904
	Others	LF_Norvaline	0.085995	0.0810635	0.825062	0.396023	0.297953	0.0154239	0.593245	1.27666	0.0152638	0.357637	0.0891397	0.0106227
	Others	LF_O_Acetylserine	0	0	0	0	0	0	0	0	0	0	0	0
	Others	LF_O_Phospho_Serine	0	0	0	0	0	0.0257124	0.0395247	0.125632	0	0.0220626	0.0807762	0
	Others	LF_O_Phosphoethanolamine	1.61719	0.679237	4.89636	8.7318	2.37467	2.31794	0.33694	11.5506	3.81632	0.546203	18.6133	2.14973
	Others	LF_Octadecanol	0	0	0	0	0	0	0	0	0	0	0	0
	Others	LF_Octanoic_acid	0	0	0	0	24.2649	29.3013	96.3191	61.0175	69.6255	52.8484	45.7559	24.733
	Others	LF_Octopamine	0	0	0	0	0	0	0	0	0	0	0	0
	Others	LF_Oleamide	_4.4621740625	_3.52103884615385	_2.2342893	_4.62866166666667	2.89372	3.49422	7.17985	0.731494	1.55477	1.67108	1.05978	3.33285
	Others	LF_Oleic_acid	0	0	0	0	8.33567	3.87077	6.7659	7.522	37.6875	9.06157	8.60729	3.96041
	Others	LF_Ornithine	1.59318	5.58381	7.80568	4.40908	25.9168	42.6344	45.0224	19.2473	4.17595	4.33394	2.26202	4.70801
	Others	LF_Orotic_acid	0	0	0	0	0	0	0	0.0203656	0.00463189	0	0.0215221	0
	Others	LF_Oxalacetic_acid	0	0	0	0	0	0	0	0	0	0	0	0
	Others	LF_Oxalic_acid	_0.43183625	1.97918	0.136084	_0.658768055555556	0.639455	0.641655	1.59331	0.818912	0.902187	0.710591	0.657425	0.975706
	Others	LF_p_Aminohippuric_acid	0	0	0	0	0	0	0	0	0	0	0	0
	Others	LF_Palmitic_acid	7.82861	15.982	7.91312	_0.339280833333333	6.44556	5.51193	13.0587	7.09758	6.4336	5.61183	5.05091	5.34696
	Others	LF_Palmitoleic_acid	0	0	0	0	0	0	0	0	0	0	0	0
	Others	LF_Pantothenic_acid	0.153317	0.104258	0.310223	0.183382	0.0983383	0.0850299	0.121197	0.247195	0.105579	0.0823179	0.266836	0.109858
	Others	LF_ParaXanthine	0	0	0	0	0	0	0	0	0	0	0	0
	Others	LF_Phenylacetic_acid	7.16641	24.7706	109.46	24.0527	11.3062	4.33203	47.2252	52.0617	1.17726	20.6134	8.8938	1.94887
	Amino_acid	LF_Phenylalanine	34.992	13.7862	39.1971	15.8086	6.71338	13.3617	10.6082	17.7506	18.5776	3.92297	23.8439	4.48813
	Others	LF_Phenylpyruvic_acid	0	0	0	0	0.0471603	0.281846	0	0.357779	0.0448078	0	0.109016	0.0629808
	Others	LF_Phosphoenolpyruvic_acid	0	0	0	0	0	0.005691	0.0130557	0.00392564	0.0043016	0.0075537	0	0
	Others	LF_Phosphoric_acid	1.95109	2.14922	9.76744	16.4933	16.6603	12.6178	1.56036	2.63412	1.39692	1.55264	4.63974	9.45259
	Others	LF_Pimelic_acid	0	0	0	0	0	0	0	0.0890471	0	0.0432975	0	0
	Others	LF_Porphobilinogen	0	0	0	0	0	0	0	0	0	0	0	0
	Amino_acid	LF_Proline	11573.2	5962.26	12132.2	7900.97	28.2522	60.0523	26.8719	123.678	93.0981	3.03433	153.936	17.6258
	Others	LF_Protocatechuic_acid	0.0868756	0.103707	0.450874	0.0624553	0.0249651	0.0773679	0.634103	0.228356	0.0120872	0.4035	0.0323956	0.0204501
	Carbohydrate	LF_Psicose	5.26506	0.182475	7.27792	0.0625108	0.0152898	0.0130446	0.0486884	0.03789	0.262884	1.83276	0.815445	1.2581
	Others	LF_Putrescine	2.81182	75.07	5.49148	3.15572	5.04089	0.169804	0.573874	0.806049	0.254044	0.40566	0.297269	0.171558
	Others	LF_Pyridoxal	0	0	0	0	0.0396651	0.0076431	0.107552	0.0511803	0.0900869	0.322995	0.18573	0.287608
	Others	LF_Pyridoxal_5_phosphate	0	0	0	0	0	0	0	0	0	0	0	0
	Others	LF_Pyridoxamine	0	0	0	0	0	0	0	0.0493538	0	0.0850176	0	0
	Others	LF_Pyridoxine	0	0	0	0	0.0151197	0.0131481	0.0274699	0.0114731	0.0239663	0.025092	0.0409597	0.0336825
	Others	LF_Pyrogallol	0.271117	0.350385	0.314223	0.168564	0.0108147	0.0148353	0.0643715	0.0260007	0.0243685	0.0605523	0.0678856	0.0357435
	Others	LF_Pyruvic_acid	3.70934	5.75026	4.50236	1.49586	1.55786	1.46229	5.24902	5.35192	1.2864	1.00442	3.01862	2.61534
	Others	LF_Quinolinic_acid	0	0	0	0	0	0	0	0	0	0	0.00445	0
	Carbohydrate	LF_Rhamnose	1.18274	0.512706	9.64641	0.899766	2.04186	1.57155	6.1779	6.92021	0.169078	6.85286	1.17485	0.610382
	Carbohydrate	LF_Ribitol	0.309093	0.76206	0.374891	0.28571	0.215706	0.148436	0.148101	0.120449	0.0918841	0.0876552	0.174826	0.151526
	Others	LF_Ribonic_acid	0	0	0	0	0.455985	0.605106	0.688369	0.177982	0.729302	0.262645	0.793841	0.692479
	Others	LF_Ribonolactone	0	0	0	0	0.2887	0.261415	0.170536	0.157376	0.134773	0.094677	0.254789	0.233515
	Carbohydrate	LF_Ribose	2.51695	3.01342	5.5139	1.70695	1.67114	1.07271	4.7183	5.18295	1.64406	4.2357	4.11766	1.80602
	Others	LF_Ribose_5_phosphate	0	0	0	0	0.152605	0.140996	0.0301061	0.0631178	0.0516504	0.0601404	0.123639	0.108306
	Carbohydrate	LF_Ribulose	0.303739	0.754191	0.742401	0.166362	0.243065	0.203818	1.09541	0.315244	0.164233	0.526559	0.255901	0.314064
	Others	LF_Ribulose_5_phosphate	0	0	0	0	0.211978	0.150529	0	0.0685478	0.0514675	0.0628626	0.135431	0.170316
	Others	LF_S_Benzyl_Cysteine	0	0	0	0	0	0	0	0	0	0	0	0
	Others	LF_Saccharopine	0	0	0	0	0	0	0	0	0	0	0	0
	Others	LF_Sarcosine	0	0	0	0	1.45348	0.554381	1.41498	1.62191	0.573384	0.875416	1.09499	0.589676
	Others	LF_Sebacic_acid	0	0	0	0	0	0	0	0.0360704	0.127872	0.112378	0.248338	0.175974
	Others	LF_Sedoheptulose_7_phosphate	0	0	0	0	0	0	0	0	0	0	0	0
	Amino_acid	LF_Serine	123.078	104.302	148.014	79.8552	17.4766	14.3833	27.6886	42.9334	32.7003	8.77203	54.8496	16.3264
	Others	LF_Serotonine_2	0.0489412	0.0843162	0.584687	0.142954	#N/A	#N/A	#N/A	#N/A	#N/A	#N/A	#N/A	#N/A
	Others	LF_Shikimic_acid	0	0	0	0	0.0444657	0.0923358	0.0612862	0.0404026	0.100357	0.0280995	0.0984497	0.0709152
	Carbohydrate	LF_Sorbitol	2.30931	0.106777	1.07735	0.0341483	1.32876	1.44441	2.19109	0.171308	4.52758	2.28926	5.89293	2.20303
	Carbohydrate	LF_Sorbose	8.72146	0.201303	12.379	0.105187	0	0	0	0	0	0	0	0
	Others	LF_Spermidine	0	0	0	0	0	0	0	0	0	0	0	0
	Others	LF_Spermine	0	0	0	0	18.9379	1.89067	13.3359	1.97165	5.06805	17.7635	4.18123	3.82895
	Others	LF_Stearic_acid	8.84971	11.1036	8.15707	1.53125	7.12719	6.5779	13.9302	7.88034	5.73543	6.24918	5.59698	6.35462
	Others	LF_Suberic_acid	0	0	0	0	0.0281791	0.0360543	0.0505595	0.0883399	0.0295922	0.0447633	0.0462074	0.0251997
	Others	LF_Suberylglycine	0	0	0	0	0	0	0	0	0	0	0	0
	Others	LF_Succinic_acid	8.01186	67.1406	14.841	3.89344	60.0524	70.7558	86.8626	35.4691	12.0144	12.846	9.32114	21.1692
	Others	LF_Succinylacetone	0	0	0	0	0	0	0	0	0	0	0	0
	Others	LF_Sucrose	4.97167	0.302314	0.167446	0.0954261	0.016648	0.0209607	0.0263937	0.0126041	2.22308	0.374039	1.89408	2.59716
	Carbohydrate	LF_Tagatose	0	0	0	0	0.0118347	0.0074232	0.0385721	0.0345878	0.200626	1.06427	0.528071	0.832792
	Others	LF_Tartaric_acid	0	0	0	0	0	0	0	0	0	0	0	0
	Others	LF_Taurine	2.77351	1.34988	2.59814	3.85776	2.85645	10.7649	3.01899	2.48295	2.10753	6.45086	0.427019	10.695
	Others	LF_Thiodiglycolic_acid	0	0	0	0	0	0	0	0	0	0	0	0
	Carbohydrate	LF_Threitol	0.0903241	0.303164	0.0867819	0.0514839	0.171091	0.122258	0.156279	0.0831022	0.0654869	0.0817566	0.0862818	0.0858639
	Others	LF_Threo_b_hydroxyaspartic_acid	0	0	0	0	0	0	0	0	0	0	0	0
	Others	LF_Threonic_acid	0.343009	1.63604	0.228515	0.108363	0.13838	0.165602	0.24838	0.17372	0.196328	0.0353817	0.310429	0.155075
	Amino_acid	LF_Threonine	92.8658	34.6836	117.332	51.0721	10.913	10.7154	11.5155	40.9679	29.5812	2.92948	57.5555	6.23383
	Others	LF_Thymidine	0	0	0	0	0	0	0	0	0	0	0	0
	Others	LF_Thymidine_monophosphate	0	0	0	0	0	0	0	0	0	0	0	0
	Others	LF_Thymine	0.277571	0.420511	0.554636	0.173534	0.324223	0.29421	0.462122	0.251931	0.159219	0.201744	0.292036	0.143719
	Others	LF_Tiglylglycine	0	0	0	0	0	0	0	0	0	0	0	0
	Others	LF_trans_Aconitic_acid	0	0	0	0	0.171578	0.109208	0	0.088404	0.0585594	0.0642966	0.122093	0.112294
	Others	LF_Trehalose	0.720023	0.0526601	0.187463	0.0232817	0	0.0064095	0.0389528	0.0145118	0.0887188	0.032976	0.149306	0.170051
	Others	LF_Trehalose_6_phosphate	0	0	0	0	0	0	0	0	0	0	0	0
	Others	LF_Triethanolamine	0	0	0	0	0.0139132	0.0077628	0.013518	0.00846191	0.00238868	0.0032061	0.00433529	0.004086
	Others	LF_Tropic_acid	0	0	0	0	0	0	0	0	0	0	0	0
	Others	LF_Tryptamine	2.21788	0.686743	0.617094	0.44484	0.296008	0.485689	0.466828	0.342506	1.47913	0.580842	1.6336	1.21454
	Amino_acid	LF_Tryptophan	19.4464	7.74292	22.7628	12.986	0.654091	1.17156	0.752918	1.25361	0.943737	0.115738	0.833606	0.205759
	Others	LF_Tyramine	0.10326	0.302067	0.135637	0.0552758	0.0286477	0.0485223	0.125473	0.0882952	0.0552957	0.0601521	0.120485	0.0457671
	Amino_acid	LF_Tyrosine	37.1322	16.7299	40.6117	18.0071	9.01648	14.0401	13.6868	19.7078	17.5622	1.72398	13.3173	4.07153
	Others	LF_Uracil	4.52295	7.00717	9.57026	5.61651	3.72156	2.7622	5.30419	5.84531	3.40647	2.18868	6.31647	3.1555
	Others	LF_Urea	0.34851	0.866491	0.840293	0.259142	0.0761963	0.0197325	0.0265009	0.0203607	0.0310786	0.0109071	0.0297929	0.0209604
	Others	LF_Ureidopropionic_acid	0	0	0	0	0.0201835	0	0	0.0992506	0	0.0103926	0.0583606	0
	Others	LF_Ureidosuccinic_acid	0	0	0	0	0.0171555	0.0534639	0.0357262	0.0409064	0.0375608	0.0274311	0.0662926	0.0462615
	Others	LF_Uric_acid	2.93672	1.39068	14.6539	19.2525	0.104535	0.26024	0.459263	17.2495	1.12965	0.092106	2.77503	0.586147
	Others	LF_Uridine	0	0	0	0	0	0	0	0	0	0	0	0
	Others	LF_Uridine_monophosphate	0	0	0	0	0	0	0	0	0	0	0	0
	Others	LF_Urocanic_acid	0	0	0.383944	0.0604472	0.0342158	0.015216	0.0714259	0.423338	0.0322828	0.0413199	0.133132	0.0176751
	Amino_acid	LF_Valine	94.0587	53.3263	108.144	49.0165	18.4992	30.4135	29.4797	44.4779	38.4596	5.42931	43.6616	10.6116
	Others	LF_Valproic_acid	0	0	0	0	0	0	0	0	0	0	0	0
	Others	LF_Vanillylamine	0	0	0	0	0	0	0	0	0	0	0	0
	Others	LF_Vanilmandelic_acid	0	0	0	0	0	0	0	0	0.00205019	0.0014256	0.00245088	0.0020598
	Others	LF_Xanthine	2.03507	1.5173	7.43422	6.13988	1.58885	1.72323	1.0203	9.3468	1.81833	0.908317	4.44772	1.95151
	Others	LF_Xanthosine	0	0	0	0.0322228	0.00362802	0	0	0.0275411	0.0958545	0.0092076	0.213846	0.0077199
	Others	LF_Xanthosine_monophosphate	0	0	0	0	0	0	0	0	0	0	0	0
	Carbohydrate	LF_Xylitol	0.372086	1.15032	0.53445	0.305235	0.302429	0.247995	0.197759	0.152725	0.131265	0.0995256	0.223292	0.254716
	Carbohydrate	LF_Xylobiose	0	0	0	0	0.0158273	0.0208539	0.0231415	0.0168761	0.00809434	0.046599	0.0245962	0.0169677
	Others	LF_Xylose	0.226625	0.104567	0.873045	0.0483883	0.123127	0.0602601	0.502279	0.201676	0.08337	0.570976	0.191731	0.13587
	Carbohydrate	LF_Xylulose	0.592316	1.01904	1.10543	0.302061	0.390137	0.348455	1.49319	0.958601	0.403734	0.888996	0.782379	0.58469
	Organic_acid	Phosphoric_acid	1046.68	1294.32	1341.15	1224.76	2972.07	1124.86	1077.59	1934.67	1613.2	897.264	1249.91	1346.23
	Organic_acid	Lactic_acid	6174.48	16700.1	4621.87	10735.8	13824.9	11995.4	10643.1	2082.82	1795.52	1534.21	2204.35	14777.2
	Organic_acid	Succinic_acid	66.411	549.761	78.873	17.506	627.928	412.542	615.682	74.032	86.124	161.781	34.026	292.735
	Organic_acid	Acetic_acid	449.108	494.679	2710.01	690.812	2327.47	2085.63	2928.72	2590.33	2991.06	5263.51	1538.46	703.78
	Organic_acid	Propionic_acid	52.732	26.998	373.536	87.693	214.542	446.4	213.296	332.611	191.815	321.843	142.069	102.759
	Organic_acid	Butyric_acid	46.928	0	740.57	130.227	786.636	527.563	1297.63	987.372	1421.54	2128.84	470.563	83.893
	Organic_acid	Valeric_acid	0	0	0	0	0	0	0	53.092	0	38.135	0	0
	Organic_acid	Isovaleric_acid	0	0	30.542	0	0	0	0	79.456	0	18.085	0	0
	Others	LV_1_Hexadecanol	0	0	0	0	0	0	0	0	0	0	0	0
	Others	LV_1_5_Anhydro_glucitol	0	0	0	0	0	0	0	0	0	0	0	0
	Others	LV_1_6_Anhydroglucose	0.0445121	0.0254377	0.0500451	0.0878274	0.0412845	0.0456849	0.0647859	0.0420043	0.0211876	0.0403185	0.0497194	0.0468213
	Others	LV_2_Aminoadipic_acid	0.0184269	0	0	0.0330186	0.0244615	0	0.0449344	0.0125197	0	0.0191034	0.0122712	0.0315847
	Others	LV_2_Aminoethanol	0.672403	0.732094	0.544081	0.788822	0.496685	0.461459	0.435191	0.441608	0.198575	0.336761	0.610477	0.53538
	Others	LV_2_Aminoisobutyric_acid	0.33329	0.351514	0.418092	0.378311	0.374202	0.393901	0.348498	0.387103	0.236058	0.244887	0.306953	0.249488
	Others	LV_2_Aminooctanoic_acid	0	0	0	0	0	0	0	0	0	0	0	0
	Others	LV_2_Aminopimelic_acid	0	0	0	0	0	0	0	0	0	0	0	0
	Others	LV_2_Deoxy_glucose	0	0	0	0	0	0	0	0	0	0	0	0
	Others	LV_2_Hydroxybutyric_acid	0.0499804	0.0386189	0.050244	0.097455	0.0575692	0.0237606	0.0628005	0.0306166	0.0277503	0.0404026	0.0352067	0.063464
	Others	LV_2_Hydroxyglutaric_acid	0.0434942	0.00711177	0.0204755	0.0350321	0.08583	0.0409958	0.0495519	0.02003	0.0180914	0.0218379	0.0459279	0.0266633
	Others	LV_2_Hydroxyhippuric_acid	0	0	0	0	0	0	0	0	0	0	0	0
	Others	LV_2_Hydroxyisobutyric_acid	0	0	0	0	0	0	0	0	0	0	0	0
	Others	LV_2_Hydroxyisocaproic_acid	0	0	0	0	0	0	0	0	0	0	0	0
	Others	LV_2_Hydroxyisovaleric_acid	0	0	0	0	0	0	0	0	0	0	0	0
	Others	LV_2_Isopropylmalic_acid	0.0123967	0.0136364	0.0153061	0.0151515	0.0151515	0.0154639	0.015625	0.0147059	0.0125	0.0125	0.0133929	0.0120968
	Others	LV_2_Keto_isovaleric_acid	0	0	0	0	0	0	0	0	0	0	0	0
	Others	LV_2_Ketoadipic_acid_oxime	0	0	0	0	0	0	0	0	0	0	0	0
	Others	LV_2_Ketobutyric_acid	0.829201	1.15457	1.19074	1.09039	1.22246	1.31928	1.1354	1.08033	0.975167	0.863437	1.12612	0.958746
	Others	LV_2_Ketoglutaric_acid	0	0	0	0	0	0	0	0	0	0	0	0
	Others	LV_2_Ketoisocaproic_acid	0.0585378	0	0	0.0683817	0.0840314	0	0	0	0	0	0	0
	Others	LV_2_Methyl_3_hydroxybutyric_acid	0	0	0	0	0	0	0	0	0	0	0	0
	Others	LV_2_Methylhippuric_acid	0	0	0	0	0	0	0	0	0	0	0	0
	Others	LV_2_Phosphoglyceric_acid_	0	0	0	0	0	0	0	0	0	0	0	0
	Others	LV_2_Propyl_3_hydroxy_pentanoic_acid	0	0	0	0	0	0	0	0	0	0	0	0
	Others	LV_2_Propyl_glutaric_acid	0	0	0	0	0	0	0	0	0	0	0	0
	Others	LV_2_3_Bisphosphoglyceric_acid	0	0	0	0	0	0	0	0	0	0	0	0
	Others	LV_2_Deoxyuridine	0	0	0	0.588775	0.671787	0.788184	0.800632	0.835716	0.456096	0.949562	1.07982	0.649297
	Others	LV_3_Aminoglutaric_acid	4.23342	2.84248	3.13251	7.84688	3.29063	3.43453	2.18758	3.60332	1.73853	3.72631	3.77126	4.11207
	Others	LV_3_Aminoisobutyric_acid	0.0760745	0.0707028	0.0365547	0.112682	0.0358779	0.0503321	0.0412322	0.0376056	0.0242822	0.0427361	0.0804561	0.0355821
	Others	LV_3_Aminopropanoic_acid	1.2861	1.11395	0.962929	1.83	0.8862	0.741189	0.944598	0.766889	0.427117	0.772265	1.01469	0.927229
	Others	LV_3_Dehydroshikimic_acid	0	0	0	0	0	0	0	0	0	0	0	0
	Others	LV_3_Hydroxy_3_methylglutaric_acid	0	0	0	0	0	0	0	0	0	0	0	0
	Others	LV_3_Hydroxy_kynurenine	0	0	0	0	0	0	0	0	0	0	0	0
	Others	LV_3_Hydroxyanthranilic_acid	0	0	0	0	0	0	0	0	0	0	0	0
	Others	LV_3_Hydroxybutyric_acid	0.849953	0.661944	1.05306	1.49134	0.394093	0.569544	0.453398	0.956665	0.35922	0.814706	0.966338	0.555688
	Others	LV_3_Hydroxyglutaric_acid	0.508937	0.518999	0.622141	0.556577	0.602969	0.648885	0.610145	0.567684	0.493089	0.475036	0.577263	0.495547
	Others	LV_3_Hydroxyisobutyric_acid	0.161454	0.123597	0.191556	0.279535	0.083778	0.110144	0.0954053	0.188115	0.0685193	0.15109	0.181454	0.115584
	Others	LV_3_Hydroxyisovaleric_acid	0	0	0	0	0	0	0	0	0	0	0	0
	Others	LV_3_Hydroxyphenylacetic_acid	0	0	0	0	0	0	0	0	0	0	0	0
	Others	LV_3_Hydroxypropionic_acid	0.0143343	0.0183584	0.0207588	0.0284033	0.0265967	0.0295463	0.0311961	0.0238007	0.007962	0.022425	0.0176849	0.011284
	Others	LV_3_Hydroxypyruvic_acid	0	0	0	0	0	0	0	0	0	0	0	0
	Others	LV_3_Methoxy_4_hydroxybenzoic_acid	0.0534558	0.032586	0.0241837	0.0215136	0	0	0	0	0	0	0	0
	Others	LV_3_Methyl_2_oxovaleric_acid	0	0	0	0	0	0	0	0	0	0	0	0
	Others	LV_3_Methyladipic_acid	0	0	0	0	0	0	0	0	0	0	0	0
	Others	LV_3_Methylcrotonoylglycine	0	0	0	0	0	0	0	0	0	0	0	0
	Others	LV_3_Methylglutaric_acid	0	0	0	0	0	0	0	0	0	0	0	0
	Others	LV_3_Phenyllactic_acid	0.00431219	0	0	0.00297061	0	0	0	0	0	0	0	0
	Others	LV_3_Phosphoglyceric_acid	0	0	0	0.0739958	0.0704979	0	0	0.0918424	0	0.087658	0.0775164	0.0554684
	Others	LV_3_Sulfinoalanine	0.024489	0	0.0314669	0.0950811	0.0513579	0.0360628	0.0809916	0.0313971	0.0144913	0.0298398	0.0368788	0.0528531
	Others	LV_3_4_Dihydroxybenzylamine	0	0	0	0	0	0	0	0	0	0	0	0
	Others	LV_4_Aminobenzoic_acid	0	0	0	0	0	0	0	0	0	0	0	0
	Others	LV_4_Aminobutyric_acid	0.0379476	0.0937927	0.0465009	0.150688	0.0410205	0.0395244	0.0250592	0.0191019	0.0181503	0.028557	0.036831	0.0295871
	Others	LV_4_Hydroxybenzoic_acid	0.0189678	0.0185569	0.0196399	0.0162514	0.00950833	0.0116927	0.00742703	0.00813559	0.00393588	0.00582625	0.00677705	0.00591992
	Others	LV_4_Hydroxyphenyllactic_acid	0.006615	0.00538827	0.00397332	0.00948394	0.00736909	0.00237619	0.00793312	0.00284191	0.00171237	0.00376275	0.00529996	0.00252012
	Others	LV_4_Hydroxyphenylpyruvic_acid	0	0	0	0	0	0	0	0	0	0	0	0
	Others	LV_4_Hydroxyproline	0.513286	0.351892	0.45045	0.859456	0.509969	0.254814	0.40956	0.630146	0.269451	0.413183	0.601729	0.573424
	Others	LV_5_Aminolevulinic_acid	0	0	0	0	0	0	0	0	0	0	0	0
	Others	LV_5_Aminovaleric_acid	0.0227447	0.0571441	0.0305778	0.107561	0.0364485	0.0131374	0.0111939	0.00829676	0.0104626	0.0121205	0.0142279	0.0115657
	Others	LV_5_Dehydroquinic_acid	0.157527	0.0691207	0.231725	0.257597	0.170998	0.214684	0.209438	0.22767	0.155349	0.196464	0.232113	0.188713
	Others	LV_5_Hydroxy_tryptophan	0	0	0	0	0	0	0	0	0	0	0	0
	Others	LV_5_Hydroxymethyl_2_furoic_acid	0	0	0	0	0	0	0	0	0	0	0	0
	Others	LV_5_Methoxytryptamine	0.00767417	0.00517677	0.00576827	0.0142135	0.00624394	0.00449613	0.00699281	0.00583044	0.00387487	0.00532137	0.00879295	0.00842129
	Others	LV_5_Oxoproline	0.913957	1.37033	1.33018	2.12703	1.34317	1.38134	1.28771	1.16475	0.668448	1.01313	1.43482	0.988597
	Others	LV_5_Methylthioadenosine	0	0	0	0	0	0	0	0	0	0	0	0
	Others	LV_6_Phosphogluconic_acid	0	0	0	0	0	0	0	0	0	0	0	0
	Others	LV_7_Methylguanine	0	0	0	0	0	0	0	0	0	0	0	0
	Others	LV_Acetoacetic_acid_oxime	0	0	0	0	0	0	0	0	0	0	0	0
	Others	LV_Acetylglycine	0	0	0	0	0	0	0	0	0	0	0	0
	Others	LV_Aconitic_acid	0	0	0	0	0	0	0	0	0	0	0	0
	Others	LV_Adenine	0.0779809	0.0449795	0.11751	0.192544	0.142004	0.14218	0.168785	0.147959	0.102055	0.143389	0.165127	0.120025
	Others	LV_Adenosine	0.0246019	0.0243301	0.0474712	0.0581885	0.0313639	0.0373395	0.0318958	0.0396165	0.0261149	0.0288415	0.0411009	0.0188926
	Others	LV_Adenosine_3_5_cyclic_monophosphate	0	0	0	0	0	0	0	0	0	0	0	0
	Others	LV_Adenosine_monophosphate	0	0	0	0	0	0	0	0	0	0	0	0
	Others	LV_Adipic_acid	0	0	0	0	0	0	0	0	0	0	0	0
	Amino_acid	LV_Alanine	3.69477	3.15743	1.6475	3.62132	1.96521	1.78267	3.12686	1.51277	0.590965	1.54117	3.17637	2.43226
	Others	LV_Allantoin	0	0	0	0	0	0	0	0	0	0	0	0
	Carbohydrate	LV_Allose	51.9386	11.2977	77.3551	142.943	39.1077	67.3816	92.3396	76.0755	40.8321	54.9214	55.6424	58.7137
	Others	LV_Anthranilic_acid	0	0	0	0	0	0	0	0	0	0	0	0
	Others	LV_Arabinose	0	0	0	0	0	0	0	0	0	0	0	0
	Carbohydrate	LV_Arabitol	0.0478664	0.0382486	0.0748018	0.0832611	0.0599882	0.064785	0.0704827	0.0635829	0.0407979	0.0539121	0.0654355	0.0573856
	Others	LV_Arachidonic_acid	0	0	0	0	0	0	0	0	0	0	0	0
	Amino_acid	LV_Arginine	0.454444	0.309488	0.41882	0.5265	0.497956	0.282982	0.506869	0.362687	0.192332	0.432801	0.518542	0.630091
	Others	LV_Ascorbic_acid	2.59506	8.23105	7.01569	23.1922	5.15455	3.41688	5.32247	15.2257	3.17327	42.5226	32.0844	14.9811
	Amino_acid	LV_Asparagine	0.17191	0.215666	0.187368	0.21201	0.226349	0.102234	0.116744	0.166344	0.0439655	0.313676	0.168624	0.28006
	Amino_acid	LV_Aspartic_acid	4.24738	2.85568	3.13279	7.86613	3.30651	3.44654	2.1693	3.58379	1.74579	3.72513	3.761	4.1082
	Others	LV_Azelaic_acid	0	0	0	0	0	0	0	0	0	0	0	0
	Others	LV_Batyl_alcohol	0	0	0	0	0	0	0	0	0	0	0	0
	Others	LV_Benzoic_acid	0.0196846	0.0170688	0.0178768	0.0203397	0.0130306	0.0196999	0.0127581	0.0131422	0.00789488	0.0112893	0.0131133	0.00942423
	Others	LV_Biotin	0	0	0	0	0	0	0	0	0	0	0	0
	Others	LV_Cadaverine	0	0	0	0	0	0	0	0	0	0	0	0
	Others	LV_Caproic_acid	0.584083	0.830085	0.717727	0.644141	0.207258	0.77402	0.251913	0.640006	0.48209	0.201566	0.596186	0.414674
	Others	LV_Carnosine	0	0	0	0	0	0	0	0	0	0	0	0
	Others	LV_Catechol	0	0	0	0	0	0	0	0	0	0	0	0
	Carbohydrate	LV_Cellobiose	0	0	0	0	0	0	0	0	0	0	0	0
	Others	LV_Cholecalciferol	0	0	0	0	0	0	0	0	0	0	0	0
	Others	LV_Cholesterol	0	0	0	0	0	0	0	0	0	0	0	0
	Others	LV_Citramalic_acid	0	0	0	0	0	0	0	0	0	0	0	0
	Others	LV_Citric_acid	0	0	0	0.0115032	0	0	0	0.0112393	0	0.00978838	0	0
	Others	LV_Citrulline	0	0	0	0	0	0	0	0	0	0	0	0
	Others	LV_Coniferyl_alcohol	0	0	0	0	0	0	0	0	0	0	0	0
	Others	LV_Coniferyl_aldehyde	0	0	0	0	0	0	0	0	0	0	0	0
	Others	LV_Creatinine	0.307299	0.185445	0.250214	0.525734	0.284644	0.349059	0.50959	0.184835	0.403779	0.185783	0.344148	0.424545
	Others	LV_Cystamine	0.00646599	0.0070875	0.00670423	0.0135402	0.00744121	0.00891789	0.0211389	0.00660706	0.00457625	0.00988512	0.0145959	0.0116323
	Others	LV_Cystathionine	0	0	0	0.132649	0.0810629	0	0.0861016	0.0666062	0.0544989	0.110151	0.0895532	0.0854839
	Others	LV_Cysteic_acid	0	0	0	0	0	0	0	0	0	0	0	0
	Amino_acid	LV_Cysteine	1.39835	0.892174	1.33675	2.37488	1.60854	1.63064	2.55958	1.22791	0.616236	1.2834	1.8154	1.55181
	Others	LV_Cystine	0	0	0	0	0	0	0	0	0	0	0	0
	Others	LV_Cytidine	0	0	0	0	0	0	0	0	0	0	0	0
	Others	LV_Cytosine	0	0	0	0.0178929	0.0183588	0.0126475	0.0109605	0.00911324	0.00724713	0.0103921	0.015472	0.00984593
	Others	LV_Decanoic_acid	0.0297398	0.0377708	0.0352229	0.0343302	0.0308167	0.0346885	0.0323036	0.0314954	0.0258185	0.0218062	0.0283804	0.0238231
	Others	LV_Dihydroorotic_acid	0	0	0	0	0	0	0	0	0	0	0	0
	Others	LV_Dihydrouracil	2.22571	1.56355	2.68261	1.71693	3.89215	1.63341	0	1.68024	1.04904	1.14885	0	1.04169
	Others	LV_Dihydroxyacetone	0	0	0	0	0	0	0	0	0	0	0	0
	Others	LV_Dihydroxyacetone_phosphate	10.2861	8.83287	15.6942	22.2155	29.3465	27.8967	35.448	30.6355	14.2212	22.2862	32.0058	22.6256
	Others	LV_Dimethylglycine	0.160111	0.168758	0.198193	0.203736	0.236048	0.143671	0.127541	0.105905	0.063384	0.0886293	0.125881	0.112538
	Others	LV_Docosahexaenoic_acid	0	0	0	0	0	0	0	0	0	0	0	0
	Others	LV_Dodecanedioic_acid	0	0	0	0	0	0	0	0	0	0	0	0
	Others	LV_Dopa	0	0	0	0	0	0	0	0	0	0	0	0
	Others	LV_Dopamine	0	0	0	0	0	0	0	0	0	0	0	0
	Others	LV_Eicosapentaenoic_acid	0	0	0	0	0	0	0	0	0	0	0	0
	Others	LV_Elaidic_acid	0	0	0	0	0	0	0	0	0	0	0	0
	Others	LV_Epinephrine	0	0	0	0	0	0	0	0	0	0	0	0
	Others	LV_Erythrose_4_phosphate	0	0	0	0	0	0	0	0	0	0	0	0
	Carbohydrate	LV_Erythrulose	1.89629	2.4906	2.72968	2.29388	2.49388	2.5753	2.42005	2.40314	1.97168	1.81772	2.34088	1.91083
	Others	LV_Ethylmalonic_acid	0	0	0	0	0	0	0	0	0	0	0	0
	Others	LV_Fendiline	0	0	0	0	0	0	0	0	0	0	0	0
	Carbohydrate	LV_Fructose	0.0367484	0.0144295	0.0518663	0.0972256	0.0354039	0.0490396	0.0492986	0.0568796	0.0249853	0.0467974	0.0481583	0.0327942
	Others	LV_Fructose_1_phosphate	0	0	0	0	0	0	0	0	0	0	0	0
	Others	LV_Fructose_6_phosphate	0	0	0	0	0	0	0	0	0	0	0	0
	Carbohydrate	LV_Fucose	0	0	0	0.0532588	0	0	0	0	0	0	0.0420115	0
	Others	LV_Fumaric_acid	0.255961	0.514819	0.402669	0.43701	0.862603	0.550513	0.347032	0.625887	0.410191	0.629659	0.45886	0.432986
	Carbohydrate	LV_Galactitol	0.0142827	0.0125341	0.0169451	0.0339456	0.0142932	0.0194493	0.045393	0.0180701	0.0100854	0.0196469	0.0167321	0.0138963
	Others	LV_Galactosamine	0	0	0	0	0	0	0	0	0	0	0	0
	Carbohydrate	LV_Galactose	0.163592	0.0302078	0.131119	0.249489	0.129372	0.201848	0.21392	0.122161	0.105234	0.111578	0.118766	0.159623
	Others	LV_Galacturonic_acid	0.0189632	0	0.0255592	0.064155	0	0.0202854	0.038112	0.0241772	0.0116461	0.0174408	0.0184884	0.0292506
	Others	LV_Glucaric_acid	0.0097774	0.00878727	0.00793102	0.0176811	0.00552818	0.0073466	0.00809938	0.00772809	0.00599937	0.0148719	0.01325	0.010113
	Others	LV_Gluconic_acid	0.0716063	0.0242178	0.0747563	0.207105	0.0431014	0.0671482	0.114898	0.0555518	0.0298029	0.0724375	0.0879039	0.0740175
	Others	LV_Glucono_1_4_lactone	0	0	0	0	0	0	0	0	0	0	0	0
	Others	LV_Glucono_1_5_lactone	63.77	23.3287	92.6017	104.913	62.2869	84.2553	82.2981	82.2924	55.9212	59.4681	68.7431	62.7696
	Carbohydrate	LV_Glucosamine	0.101686	0.0232042	0.148242	0.275431	0.0770544	0.131423	0.182464	0.136971	0.073328	0.100934	0.114345	0.112849
	Carbohydrate	LV_Glucose	63.5298	23.6288	91.6938	102.982	62.5969	84.1587	80.5658	82.0972	55.8542	59.3901	68.784	61.9118
	Others	LV_Glucose_6_phosphate	0	0	0.0614726	0.0997656	0.127274	0.204646	0.178079	0.175686	0.0587997	0.109102	0.109903	0.0850955
	Others	LV_Glucuronic_acid	0.00645893	0.00558873	0.00689939	0.0117285	0.0114527	0.0111789	0.0127523	0.0106707	0.00724787	0.00681112	0.0104058	0.00603835
	Others	LV_Glutaconic_acid	0	0	0	0	0	0	0	0	0	0	0	0
	Amino_acid	LV_Glutamic_acid	6.82721	6.41612	7.64579	15.3853	8.90012	8.01088	10.7425	6.97127	3.12755	7.28597	7.8334	7.86155
	Others	LV_Glutamic_acid_5_methylester	4.22328	2.82775	3.1264	7.76176	3.21798	3.38324	2.22885	3.62238	1.75793	3.75031	3.74168	4.05605
	Amino_acid	LV_Glutamine	0	0	0	0	0	0	0	0	0	0	0	0
	Others	LV_Glutaric_acid	0	0	0	0.0159203	0.0168833	0	0	0	0	0	0	0
	Others	LV_Glyceraldehyde	1.47648	0	0	3.26295	0	0	0	0	0	0	0	1.7605
	Others	LV_Glyceraldehyde_3_phosphate	0	0	0	0	0	0	0	0	0	0	0	0
	Others	LV_Glyceric_acid	0.0288966	0.00975123	0.0267369	0.0469744	0.0311258	0.028243	0.0345153	0.0226728	0.00882187	0.0219878	0.0277846	0.0221648
	Others	LV_Glycerol	7.4651	2.8902	7.96698	13.3714	7.17909	6.49624	7.5861	6.67982	3.37007	6.49216	6.88902	6.83242
	Others	LV_Glycerol_2_phosphate	0	0.0389355	0.0437654	0.0281273	0	0	0	0	0	0	0	0
	Others	LV_Glycerol_3_phosphate	0	0	0	0	0	0	0	0	0	0	0	0
	Amino_acid	LV_Glycine	4.80472	4.03086	4.67874	8.64272	4.51557	4.65005	6.4063	4.57719	2.05506	4.3996	5.21745	4.83607
	Others	LV_Glycolic_acid	0.0257301	0.0276391	0.0297272	0.0373452	0.0313874	0.0333976	0.0332261	0.0293901	0.0137568	0.0272661	0.025693	0.021769
	Others	LV_Glycyl_Glycine	0.00456471	0.00367732	0.00386985	0.00694955	0.00211712	0.00151639	0.00301594	0.00178353	0.00057625	0.00322275	0.00335987	0.00177484
	Others	LV_Glyoxylic_acid	0.126303	0.136031	0.158171	0.181536	0.189612	0.134173	0.110776	0.0996074	0.0534219	0.0879825	0.109888	0.0911258
	Others	LV_Guanine	0	0	0	0	0	0	0	0	0	0	0	0
	Others	LV_Guanosine	0	0	0	0	0	0	0	0	0	0	0	0
	Others	LV_Hexanoylglycine	0	0	0	0	0	0	0	0	0	0	0	0
	Others	LV_Hippuric_acid	0	0	0	0	0	0	0	0	0	0	0	0
	Others	LV_Histamine	0	0	0	0	0	0	0	0	0	0	0	0
	Amino_acid	LV_Histidine	0.163224	0.0798395	0.15992	0.502762	0.230814	0.234857	0.453301	0.324618	0.0878956	0.347177	0.321651	0.290983
	Others	LV_Histidinol	0	0	0	0	0	0	0	0	0	0	0	0
	Others	LV_Homocysteine	0	0	0	0	0	0	0	0	0	0	0	0
	Others	LV_Homogentisic_acid	0	0	0	0	0	0	0	0	0	0	0	0
	Others	LV_Homoserine	0	0	0	0	0	0	0	0	0	0	0	0
	Others	LV_Homovanillic_acid	0	0	0	0	0	0	0	0	0	0	0	0
	Others	LV_Hydroquinone	0	0	0	0	0	0	0	0	0	0	0	0
	Others	LV_Hydroxylamine	0.720792	1.37294	1.0146	0.442163	0.858922	0.972538	0.690811	0.790887	1.01227	0.67034	1.01634	0.706342
	Others	LV_Hypotaurine	0.210435	0.172663	0.246532	0.412539	0.300698	0.185358	0.241258	0.137419	0.0858789	0.119629	0.135054	0.225597
	Others	LV_Hypoxanthine	0.300383	0.209691	0.275565	0.339007	0.260652	0.276583	0.504576	0.305269	0.0858101	0.197881	0.526429	0.148948
	Others	LV_Indol_3_acetic_acid	0.00830789	0	0	0.0106427	0	0	0.00511563	0	0	0	0	0
	Others	LV_Inosine	0.0895112	0.0597506	0.10899	0.124577	0.0754418	0.0769293	0.0574675	0.0753801	0.0415582	0.0761446	0.120855	0.042653
	Others	LV_Inosine_monophosphate	0	0	0	0	0	0	0	0	0	0	0	0
	Others	LV_Inositol	28.8638	26.652	39.1383	49.3577	37.5802	26.7492	34.0717	35.7814	17.6511	27.7333	34.44	23.4953
	Others	LV_Inositol_phosphate	0	0	0	0	0	0	0	0	0	0	0	0
	Others	LV_Isobutyrylglycine	0	0	0	0	0	0	0	0	0	0	0	0
	Others	LV_Isocitric_acid	0.013652	0.0102315	0.00862423	0.0290127	0.0139086	0.0131949	0.011438	0.0156496	0.00870088	0.0156773	0.0192832	0.0163165
	Amino_acid	LV_Isoleucine	1.0367	0.950542	0.888602	1.43503	1.14755	1.1201	1.60488	0.810721	0.54936	1.04412	1.39597	0.614033
	Others	LV_Isomaltose	0	0	0	0	0	0	0	0	0	0	0	0
	Others	LV_Isovalerylglycine	0	0	0	0	0	0	0	0	0	0	0	0
	Others	LV_Juniperic_acid	0	0	0	0	0	0	0	0	0	0	0	0
	Others	LV_Kynurenic_acid	0	0	0	0	0	0	0	0	0	0	0	0
	Others	LV_Kynurenine	0	0	0	0	0	0	0	0	0	0	0	0
	Others	LV_Lactic_acid	36.4866	26.7295	31.6554	59.51	20.7633	24.7146	26.3848	24.2614	10.5977	24.5784	34.5306	32.3969
	Carbohydrate	LV_Lactitol	0.0192084	0.0113386	0.0134783	0.00730485	0.00443394	0.00538918	0.00686797	0.00485265	0.002396	0.003786	0.00357804	0.0114168
	Others	LV_Lactose	0	0	0	0	0	0	0	0	0	0.15356	0.257392	0.0646097
	Others	LV_Lactulose	0	0	0	0	0	0	0	0	0	0	0	0
	Others	LV_Lauric_acid	0	0	0	0	1.31096	0	0	0	1.06465	0	0	1.16686
	Amino_acid	LV_Leucine	0.937508	0.63063	0.692554	1.17043	0.68534	0.716361	1.12041	0.685175	0.285023	0.771204	0.98355	1.45174
	Others	LV_Linoleic_acid	0	0	0	0	0	0	0	0	0	0	0	0
	Others	LV_Lipoic_acid	0	0	0	0	0	0	0	0	0	0	0	0
	Amino_acid	LV_Lysine	0.563459	0.488165	0.498422	0.807629	0.476123	0.550032	1.72377	0.42768	0.238633	0.57115	0.715774	0.612733
	Carbohydrate	LV_Lyxose	0	0	0	0	0	0	0	0	0	0	0	0
	Others	LV_Maleic_acid	0	0	0	0	0	0	0	0	0	0	0	0
	Others	LV_Malic_acid	1.00624	1.52435	0.990868	1.25466	2.88997	1.62554	0.931428	1.81297	1.18242	2.07913	1.47904	1.35496
	Others	LV_Malonic_acid	0	0	0	0	0	0	0	0	0	0	0	0
	Carbohydrate	LV_Maltitol	0	0	0	0	0	0	0	0	0	0	0	0
	Carbohydrate	LV_Maltose	0.0348017	0.0144259	0.188509	0.416823	0.200297	2.55451	0.43427	0.620173	0.110336	0.461099	1.21449	0.29737
	Carbohydrate	LV_Mannitol	0.00842603	0.0120154	0.0270314	0.0469244	0.0156121	0.0748775	0.0359423	0.0358622	0.0124686	0.0891699	0.0471988	0.0220391
	Carbohydrate	LV_Mannose	0	0	0	0	0	0	0	0	0	0	0	0
	Others	LV_Mannose_6_phosphate	0	0	0	0	0	0	0	0	0	0	0	0
	Others	LV_Margaric_acid	1.09235	0.886729	1.25137	1.01243	1.1868	1.1354	1.14504	1.03643	1.21043	0.719343	0.506562	1.06146
	Others	LV_Melatonin	0	0	0	0	0	0	0	0	0	0	0	0
	Others	LV_Mesaconic_acid	0	0	0	0	0	0	0	0	0	0	0	0
	Carbohydrate	LV_meso_Erythritol	0.0313014	0	0	0.0529441	0	0	0.0549414	0.0379459	0	0.0335854	0.0429399	0.029007
	Amino_acid	LV_Methionine	0.370627	0.246994	0.206471	0.429014	0.212456	0.268457	0.369559	0.228129	0.102883	0.280134	0.407416	0.328149
	Others	LV_Methionine_sulfone	0	0	0	0	0	0	0	0	0	0	0	0
	Others	LV_Methoprene_acid	0	0	0	0	0	0	0	0	0	0	0	0
	Others	LV_Methylmalonic_acid	0	0	0	0	0.0490262	0.0439644	0.0591816	0.0499404	0	0.0358664	0	0.0296425
	Others	LV_Methylsuccinic_acid	0	0	0	0.0202088	0.0889008	0	0	0	0	0	0	0
	Others	LV_Metoprolol	0	0	0	0	0	0	0	0	0	0	0	0
	Others	LV_Mevalonic_lactone	0	0	0	0	0	0	0	0	0	0	0	0
	Others	LV_Monostearin	0	0	0	0	0	0	0	0	0	0	0	0
	Others	LV_Myristic_acid	0	0	0	0	0	0	0	0	0	0	0	0
	Others	LV_N_Acetyl_Lysine	0	0	0	0	0	0	0	0	0	0	0	0
	Others	LV_N_Acetyl_Ornithine	0	0	0	0	0	0	0	0	0	0	0	0
	Others	LV_N_Acetylaspartic_acid	0	0	0	0	0	0	0	0	0	0	0	0
	Others	LV_N_Acetylglutamine	0	0	0	0	0	0	0	0	0	0	0	0
	Others	LV_N_Acetylmannosamine	0.108361	0.0910979	0	0.284707	0.226898	0	0.214041	0	0.0668434	0.0949316	0.119496	0.0948305
	Others	LV_N_Acetylneuraminic_acid	0	0	0	0	0	0	0	0	0	0	0	0
	Others	LV_N_Acetylserine	0	0	0	0	0	0	0	0	0	0	0	0
	Others	LV_N_Acetyltyrosine	0	0	0	0	0	0	0	0	0	0	0	0
	Others	LV_N_Butyrylglycine	0	0	0	0	0	0	0	0	0	0	0	0
	Others	LV_N6_Acetyllysine	0.00666087	0.00537545	0.00559607	0.0134836	0.0102914	0.00648216	0.0390748	0.00714868	0	0.00955287	0.0086854	0.00829476
	Others	LV_Niacinamide	0.69901	0.498744	0.836364	1.22463	0.721965	0.727252	0.92887	0.756406	0.395326	0.733348	0.838042	0.666348
	Others	LV_Nicotinic_acid	0.0358581	0.0259968	0.029964	0.0258321	0.00622924	0.0134824	0.0114059	0.00695574	0.00422087	0.00826462	0.00948817	0.00574621
	Others	LV_Nonanoic_acid	0.401598	0.595083	0.636198	0.447822	0.451552	0.599973	0.470201	0.51126	0.385777	0.379399	0.428663	0.445971
	Others	LV_Norepinephrine	0	0	0	0	0	0	0	0	0	0	0	0
	Others	LV_Norvaline	0	0	0	0	0	0	0	0	0	0	0	0
	Others	LV_O_Acetylserine	0	0	0	0	0	0	0	0	0	0	0	0
	Others	LV_O_Phospho_Serine	0	0	0	0	0	0	0	0	0	0	0	0
	Others	LV_O_Phosphoethanolamine	0.457132	0.337715	0.369862	0.629127	0.335795	0.341282	0.285328	0.270418	0.170997	0.328312	0.44243	0.237064
	Others	LV_Octadecanol	0	0	0	0	0	0	0	0	0	0	0	0
	Others	LV_Octanoic_acid	3.68094	5.06359	5.55328	4.0006	2.89833	4.59984	2.37917	4.06565	2.86867	2.24565	4.35444	2.8311
	Others	LV_Octopamine	0	0	0	0	0	0	0	0	0	0	0	0
	Others	LV_Oleamide	2.88531	3.08062	3.99376	3.9152	4.15891	4.17478	4.79535	4.16047	3.98328	3.30875	4.49856	3.91939
	Others	LV_Oleic_acid	0	0	0	0	0	0	0	0	0	0	0	0
	Others	LV_Ornithine	0.19855	0.137918	0.179478	0.211021	0.0735559	0.120061	0.124291	0.0751807	0.0572932	0.127081	0.189209	0.1529
	Others	LV_Orotic_acid	0	0	0	0	0	0	0	0	0	0	0	0
	Others	LV_Oxalacetic_acid	0	0	0	0	0	0	0	0	0	0	0	0
	Others	LV_Oxalic_acid	3.82683	3.98978	4.81941	4.47421	4.27027	4.47339	3.94746	4.44666	2.6229	2.70881	3.41569	2.75176
	Others	LV_p_Aminohippuric_acid	0	0	0	0	0	0	0	0	0	0	0	0
	Others	LV_Palmitic_acid	1.2771	1.08971	1.49556	1.36519	1.51596	1.49307	1.38489	1.29517	1.53102	0.840486	0.985111	1.33301
	Others	LV_Palmitoleic_acid	0	0	0	0	0	0	0	0	0	0	0	0
	Others	LV_Pantothenic_acid	0.0419305	0.0253023	0.0386608	0.0855445	0.0367023	0.0413508	0.0521283	0.0316444	0.0139787	0.0377427	0.0458502	0.0394662
	Others	LV_ParaXanthine	0	0	0.0253198	0.0339614	0.0228527	0.0214785	0.0207672	0.0189234	0	0.0128969	0.0156123	0
	Others	LV_Phenylacetic_acid	0	0	0	0	0	0	0	0	0	0	0	0
	Amino_acid	LV_Phenylalanine	0.360272	0.245803	0.285582	0.450768	0.289149	0.326942	0.493791	0.277146	0.122386	0.28802	0.438678	0.302114
	Others	LV_Phenylpyruvic_acid	0	0	0	0	0	0	0	0	0	0	0	0
	Others	LV_Phosphoenolpyruvic_acid	0	0	0	0	0	0	0	0	0	0	0	0
	Others	LV_Phosphoric_acid	12.3251	9.05618	13.1636	22.1581	11.1225	11.6108	15.0996	11.7598	6.21805	12.0276	15.1002	12.0717
	Others	LV_Pimelic_acid	0	0	0	0	0	0	0	0	0	0	0	0
	Others	LV_Porphobilinogen	0	0	0	0	0	0	0	0	0	0	0	0
	Amino_acid	LV_Proline	0.754362	0.545886	0.60759	0.881019	0.635708	0.384885	0.764102	0.401404	0.186634	0.415413	0.485671	1.00756
	Others	LV_Protocatechuic_acid	0	0	0	0	0	0	0	0	0	0	0	0
	Carbohydrate	LV_Psicose	0	0	0	0	0	0	0	0	0	0	0	0
	Others	LV_Putrescine	0.0120444	0.0092205	0.0118821	0.0512786	0.00705439	0.0134609	0.00985109	0.038141	0.00592738	0.0146486	0.0181397	0.0090121
	Others	LV_Pyridoxal	0	0	0	0	0	0	0	0	0	0	0	0
	Others	LV_Pyridoxal_5_phosphate	0	0	0	0	0	0	0	0	0	0	0	0
	Others	LV_Pyridoxamine	0	0	0	0	0	0	0	0	0	0	0	0
	Others	LV_Pyridoxine	0	0	0	0	0	0	0	0	0	0	0	0
	Others	LV_Pyrogallol	0.00822781	0.00725305	0.00865852	0.00740273	0.00562061	0.0051467	0.004815	0.00432412	0.00293813	0.00314687	0.00349246	0.00282266
	Others	LV_Pyruvic_acid	0.0402787	0.0273079	0.0285377	0.0590173	0.0280676	0.0207552	0.0175758	0.0251872	0.00991262	0.021275	0.0217018	0.0198985
	Others	LV_Quinolinic_acid	0	0	0	0	0	0	0	0	0	0	0	0
	Carbohydrate	LV_Rhamnose	0.0130468	0.0120053	0.0150269	0.0279955	0.0116762	0.0119358	0.0130839	0.0101178	0	0	0.0133453	0.0100323
	Carbohydrate	LV_Ribitol	0.137653	0.0688814	0.155452	0.316253	0.128473	0.146913	0.23242	0.146885	0.0785104	0.135754	0.179633	0.16601
	Others	LV_Ribonic_acid	0.180209	0.130941	0.192826	0.441585	0.18473	0.203119	0.319428	0.187809	0.0812479	0.184612	0.249152	0.202288
	Others	LV_Ribonolactone	0.0819203	0.0446929	0.0865102	0.18742	0.0863332	0.102602	0.134688	0.0998193	0.0526909	0.106152	0.111728	0.116232
	Carbohydrate	LV_Ribose	0.0785923	0.0425997	0.0843338	0.160948	0.0687548	0.0777903	0.121616	0.0681693	0.0299065	0.0463087	0.0834328	0.0704326
	Others	LV_Ribose_5_phosphate	0.177452	0.110316	0.212613	0.381972	0.158832	0.247292	0.379989	0.245616	0.101633	0.18312	0.225983	0.231871
	Carbohydrate	LV_Ribulose	0	0	0	0	0	0	0	0	0	0	0	0
	Others	LV_Ribulose_5_phosphate	0	0	0	0	0	0	0	0	0	0	0	0
	Others	LV_S_Benzyl_Cysteine	0	0	0	0	0	0	0	0	0	0	0	0
	Others	LV_Saccharopine	0	0	0	0	0	0	0	0	0	0	0	0
	Others	LV_Sarcosine	0.186587	0.22613	0.252423	0.235256	0.277522	0.247714	0.224013	0.22767	0.186984	0.170197	0.230785	0.202417
	Others	LV_Sebacic_acid	0	0	0	0	0	0	0	0	0	0	0	0
	Others	LV_Sedoheptulose_7_phosphate	0	0	0	0	0	0	0	0	0	0	0	0
	Amino_acid	LV_Serine	2.14873	2.97132	2.70362	5.81853	2.81561	2.90493	2.2484	3.37722	1.36134	3.03402	2.66219	1.39856
	Others	LV_Serotonine_2	0.00754711	0.00708109	0.00864413	0.0148174	0.00770303	0.00340577	0.00392156	0.00466456	0.00262213	0.00508763	0.00915054	0.00757935
	Others	LV_Shikimic_acid	0	0	0	0	0	0	0	0	0	0	0	0
	Carbohydrate	LV_Sorbitol	1.17733	0.251348	0.82237	2.82329	1.28372	0.810275	1.59964	0.896417	0.833526	1.31108	0.703961	0.875056
	Carbohydrate	LV_Sorbose	0.0501454	0.0172287	0.0782392	0.14457	0.0520298	0.065619	0.0707409	0.0782109	0.0236896	0.0601521	0.0521863	0.0554803
	Others	LV_Spermidine	0.00430438	0.003276	0.00445622	0.0105403	0	0	0	0	0	0	0	0.00653734
	Others	LV_Spermine	0	0	0	0	0	0	0	0	0	0	0	0
	Others	LV_Stearic_acid	1.01171	0.77828	0.979323	0.925057	0.877949	0.89204	0.846882	0.799851	1.31197	0.543227	0.612621	1.11022
	Others	LV_Suberic_acid	0	0	0	0	0	0	0	0	0	0	0	0
	Others	LV_Suberylglycine	0	0	0	0	0	0	0	0	0	0	0	0
	Others	LV_Succinic_acid	4.69477	1.62763	5.83521	9.75836	6.5808	5.03985	9.50297	4.64839	3.0946	5.43429	5.58348	5.74359
	Others	LV_Succinylacetone	0	0	0	0	0	0	0	0	0	0	0	0
	Others	LV_Sucrose	0.00768124	0.00692891	0.00656893	0.00811424	0.00319879	0.00329907	0.00408656	0.00325824	0.0021245	0.0168346	0.00458304	0.0030571
	Carbohydrate	LV_Tagatose	0	0	0	0	0	0	0	0	0	0	0	0
	Others	LV_Tartaric_acid	0	0	0	0	0	0	0	0	0	0	0	0
	Others	LV_Taurine	3.33923	3.2308	4.77413	12.636	14.2808	9.50321	9.03988	11.3334	6.61399	14.0107	15.5427	14.0459
	Others	LV_Thiodiglycolic_acid	0	0	0	0	0	0	0	0	0	0	0	0
	Carbohydrate	LV_Threitol	0	0	0	0	0	0	0	0	0	0	0	0
	Others	LV_Threo_b_hydroxyaspartic_acid	0	0	0	0	0	0	0	0	0	0	0	0
	Others	LV_Threonic_acid	0.0227122	0.0172	0.0215233	0.0284953	0.0187153	0.0117139	0.0135578	0.0243474	0.00793238	0.0145819	0.0273118	0.0375214
	Amino_acid	LV_Threonine	0.789674	0.545407	0.657819	1.0125	0.820219	0.678369	0.822195	0.688988	0.305757	0.75095	1.07602	1.55677
	Others	LV_Thymidine	0	0	0	0	0	0	0	0	0	0	0	0
	Others	LV_Thymidine_monophosphate	0	0	0	0	0	0	0	0	0	0	0	0
	Others	LV_Thymine	0.0221202	0.0244781	0.0241191	0.0275052	0.017755	0.0173702	0.0174814	0.0121071	0.00789663	0.00995512	0.0149716	0.00802452
	Others	LV_Tiglylglycine	0	0	0	0	0	0	0	0	0	0	0	0
	Others	LV_trans_Aconitic_acid	0	0	0	0	0	0	0	0	0	0	0	0
	Others	LV_Trehalose	0.0196967	0.0123059	0.0130221	0.00735788	0.00464424	0	0.00615391	0.00255206	0.00205375	0.00445125	0.00284384	0.012102
	Others	LV_Trehalose_6_phosphate	0	0	0	0	0	0	0	0	0	0	0	0
	Others	LV_Triethanolamine	0.00297236	0.00207982	0.00290755	0.00308258	0.00449545	0.00572057	0	0.00579279	0.0055425	0.00230013	0.00522174	0
	Others	LV_Tropic_acid	0	0	0	0	0	0	0	0	0	0	0	0
	Others	LV_Tryptamine	0.0403582	0.0412754	0.0381519	0.0966979	0	0.0467749	0.0658894	0	0	0.0493486	0.0411595	0.0394586
	Amino_acid	LV_Tryptophan	0.280839	0.17606	0.233483	0.355821	0.301937	0.272715	0.524916	0.264447	0.117943	0.329973	0.44845	0.344874
	Others	LV_Tyramine	0	0	0	0	0	0	0	0	0	0	0	0
	Amino_acid	LV_Tyrosine	0.543081	0.422785	0.3636	0.764355	0.332625	0.412883	0.563598	0.434137	0.153231	0.531434	0.678881	0.398079
	Others	LV_Uracil	0.349093	0.192382	0.31777	0.997962	0.53089	0.358972	0.594068	0.319412	0.157298	0.222513	0.450556	0.426558
	Others	LV_Urea	0.0750144	0.0508365	0.0996248	0.0845386	0.260324	0.0616079	0.137866	0.0680399	0.0442953	0.0666284	0.0712323	0.089836
	Others	LV_Ureidopropionic_acid	0	0	0	0	0	0	0	0	0	0	0	0
	Others	LV_Ureidosuccinic_acid	0	0	0	0	0	0	0	0	0	0	0	0
	Others	LV_Uric_acid	2.52995	1.50501	3.2555	6.96802	3.28399	3.67088	4.26808	3.52318	1.89664	3.74396	4.09964	3.92635
	Others	LV_Uridine	0	0	0.292282	0.642782	0.70443	0.762672	0.917249	0.793398	0.478212	0.968935	1.07237	0.747615
	Others	LV_Uridine_monophosphate	0	0	0	0	0	0	0	0	0	0	0	0
	Others	LV_Urocanic_acid	0	0	0	0	0	0	0	0	0	0	0	0
	Amino_acid	LV_Valine	0.579116	0.49039	0.471486	0.746067	0.562053	0.504728	0.794166	0.431362	0.215967	0.506321	0.668974	0.880807
	Others	LV_Valproic_acid	0	0	0	0	0	0	0	0	0	0	0	0
	Others	LV_Vanillylamine	0	0	0	0	0	0	0	0	0	0	0	0
	Others	LV_Vanilmandelic_acid	0	0	0	0	0	0	0	0	0	0	0	0
	Others	LV_Xanthine	1.31033	0.579805	1.50554	3.59666	1.34336	1.4741	3.29268	1.36192	0.607643	1.34094	2.2703	1.62962
	Others	LV_Xanthosine	0	0	0	0.0151556	0.0131406	0.0176592	0.017917	0.0234371	0.00950887	0.0153692	0.0266885	0.00843895
	Others	LV_Xanthosine_monophosphate	0	0	0	0	0	0	0	0	0	0	0	0
	Carbohydrate	LV_Xylitol	0.181509	0.0903245	0.208073	0.388933	0.185638	0.195193	0.278684	0.191064	0.117264	0.218895	0.219055	0.231681
	Carbohydrate	LV_Xylobiose	0	0	0	0	0	0	0	0	0	0	0	0
	Others	LV_Xylose	0	0	0	0.0161752	0.0143892	0	0	0	0	0	0	0
	Carbohydrate	LV_Xylulose	0.0101818	0.00688009	0.0135666	0.0199309	0.0118703	0.0105837	0.0147148	0.0111107	0.00662312	0.00780275	0.0106713	0.00791819
	2. Correlation coefficient of metabolites (between the long intestine feces and the liver)
	The data of N_control group
	Pearson	LV_Oxalic_acid	LV_2_Aminoisobutyric_acid	LV_Glucose_6_phosphate	LV_Erythrulose	LV_3_Hydroxyglutaric_acid	LV_Glucose	LV_2_Ketobutyric_acid	LV_Glucono_1_5_lactone	LV_Nonanoic_acid	LV_Sarcosine
	LF_3_Hydroxypropionic_acid	-0.346879	-0.26612	-0.329646	0.327205	-0.309384	-0.833794	0.404009	-0.829066	0.454935	0.096797
	LF_Mannitol	0.765653	0.815042	0.0241817	0.614851	0.663304	0.412908	0.31674	0.409561	0.703974	0.264971
	LF_Adenine	-0.207192	-0.0965481	-0.18366	0.504038	-0.0708135	-0.802985	0.573314	-0.801792	0.539422	0.311822
	LF_Lactitol	-0.605383	-0.617135	-0.571087	-0.823412	-0.545358	-0.10073	-0.927241	-0.103439	-0.517221	-0.791704
	LF_Acetylglycine	0.291323	0.424155	0.348011	0.804905	0.60459	-0.358314	0.852783	-0.365852	0.54501	0.807253
	LF_Galactose	0.410236	0.445988	-0.264704	0.132265	0.339434	0.361875	-0.201264	0.357368	0.371822	-0.171446
	LF_3_Hydroxyisobutyric_acid	-0.166352	-0.0546818	0.296245	0.431117	0.224226	-0.607151	0.631413	-0.613563	0.140312	0.625988
	LF_Cytidine	-0.462221	-0.472602	-0.568766	-0.737373	-0.439935	0.00543277	-0.897065	0.00253577	-0.409127	-0.768854
	LF_Succinic_acid	-0.300834	-0.181604	0.00875835	0.399739	0.00512915	-0.799734	0.551299	-0.802927	0.282199	0.426342
	LF_Glucaric_acid	-0.607482	-0.636811	-0.559526	-0.870042	-0.588445	-0.0531977	-0.961382	-0.0546697	-0.563888	-0.828115
	LF_3_Hydroxybutyric_acid	-0.251964	-0.140809	0.149626	0.40764	0.0833586	-0.719464	0.595735	-0.723578	0.204204	0.518731
	LF_Ornithine	0.173902	0.250631	0.718432	0.422954	0.61265	-0.0803115	0.626109	-0.0913617	-0.0856827	0.832827
	LF_Pyridoxal	-0.00829667	0.0545918	0.674903	0.202617	0.459126	-0.114082	0.442773	-0.125323	-0.299017	0.696458
	LF_Trehalose	-0.489604	-0.499963	-0.617414	-0.744144	-0.485409	-0.0315056	-0.908388	-0.0336574	-0.386827	-0.803862
	LF_Lysine	0.22972	0.240824	-0.400877	-0.115792	0.115292	0.344949	-0.442947	0.342086	0.200681	-0.405808
	LF_2_Hydroxyisobutyric_acid	-0.00915651	0.116037	0.301712	0.590959	0.359719	-0.55485	0.736364	-0.561651	0.316156	0.70368
	LF_Inositol	0.41423	0.522961	-0.0263407	0.897476	0.41827	-0.336257	0.794292	-0.335964	0.929318	0.525525
	LF_4_Aminobutyric_acid	-0.36197	-0.298843	-0.558249	0.229333	-0.456282	-0.791955	0.221642	-0.784343	0.522574	-0.148232
	LF_Tryptamine	-0.63022	-0.644507	-0.702182	-0.813198	-0.643206	-0.16239	-0.94529	-0.162751	-0.419208	-0.882668
	LF_Sucrose	-0.650441	-0.67059	-0.599321	-0.862318	-0.616173	-0.125176	-0.952735	-0.126708	-0.540256	-0.835046
	LF_Tagatose	-0.00829667	0.0545918	0.674903	0.202617	0.459126	-0.114082	0.442773	-0.125323	-0.299017	0.696458
	LF_2_Hydroxyisovaleric_acid	-0.0743889	0.0182493	-0.0937226	0.588853	-0.00561435	-0.690702	0.663539	-0.687902	0.592037	0.381688
	LF_4_Hydroxyphenyllactic_acid	-0.33511	-0.243994	-0.409711	0.345205	-0.304519	-0.850383	0.378693	-0.845939	0.525935	0.055158
	LF_Sorbitol	-0.326276	-0.284885	-0.190852	-0.496978	-0.0409641	0.00151822	-0.583338	-0.00894023	-0.433662	-0.317493
	The data of H_control group
	Pearson	LV_Oxalic_acid	LV_2_Aminoisobutyric_acid	LV_Glucose_6_phosphate	LV_Erythrulose	LV_3_Hydroxyglutaric_acid	LV_Glucose	LV_2_Ketobutyric_acid	LV_Glucono_1_5_lactone	LV_Nonanoic_acid	LV_Sarcosine
	LF_3_Hydroxypropionic_acid	-0.903157	-0.939347	-0.494536	-0.720324	-0.430663	-0.337026	-0.62256	-0.267573	-0.88716	-0.199952
	LF_Adenine	-0.861814	-0.811949	0.189768	-0.0504451	0.440933	0.14288	0.0681669	0.210077	-0.197813	-0.299421
	LF_Sebacic_acid	0.44677	0.372061	0.0882296	-0.592523	-0.795667	0.317819	-0.695485	0.28983	0.0304254	-0.450269
	LF_Lactitol	-0.963869	-0.964202	-0.460825	-0.37745	-0.0428624	-0.419498	-0.250648	-0.347979	-0.776712	0.0109778
	LF_Acetylglycine	0.193903	0.1336	0.338272	-0.695075	-0.694005	0.586001	-0.772532	0.580267	0.0751279	-0.767942
	LF_Galactose	-0.896695	-0.891538	0.162885	-0.550673	-0.0559008	0.27634	-0.456896	0.350044	-0.388264	-0.640653
	LF_3_Hydroxyisobutyric_acid	-0.0757257	-0.121729	-0.986002	-0.118006	-0.39096	-0.969614	-0.0941001	-0.972134	-0.728355	0.75152
	LF_Succinic_acid	-0.702247	-0.630957	0.205849	0.273241	0.693281	0.0657586	0.387992	0.118399	-0.0262809	-0.0615307
	LF_Glucaric_acid	-0.0595632	0.0360565	0.4728	0.807468	0.994954	0.212144	0.855698	0.214389	0.554768	0.169181
	LF_3_Hydroxybutyric_acid	0.509191	0.453882	-0.714615	0.0102082	-0.469523	-0.690487	-0.0488074	-0.735654	-0.294793	0.679326
	LF_Ornithine	-0.476562	-0.393657	0.536932	0.390439	0.802544	0.381443	0.472715	0.419183	0.314967	-0.234687
	LF_Pyridoxal	-0.894564	-0.92255	-0.139767	-0.78072	-0.384655	0.0440215	-0.695104	0.116638	-0.664655	-0.546594
	LF_Trehalose	-0.771957	-0.771858	0.323954	-0.602379	-0.120196	0.466603	-0.533198	0.532828	-0.251625	-0.801442
	LF_Lysine	-0.236364	-0.301226	0.142746	-0.916498	-0.763472	0.426391	-0.940782	0.453115	-0.281653	-0.80989
	LF_2_Hydroxyisobutyric_acid	-0.929636	-0.891911	0.0662318	-0.170135	0.315123	0.0511781	-0.0464178	0.123326	-0.343532	-0.287601
	LF_Inositol	-0.965591	-0.937812	-0.165269	-0.199313	0.230961	-0.177396	-0.0674251	-0.104457	-0.521535	-0.114332
	LF_4_Aminobutyric_acid	-0.040423	-0.0309025	-0.771698	0.419063	0.201772	-0.924556	0.466172	-0.93217	-0.399869	0.958651
	LF_Tryptamine	-0.210142	-0.135414	0.850131	0.322377	0.698396	0.742637	0.355324	0.763766	0.599608	-0.521171
	LF_Sucrose	-0.727957	-0.661537	0.334045	0.148127	0.619903	0.234982	0.256397	0.291791	0.0107717	-0.264525
	LF_Tagatose	-0.538016	-0.590089	0.0843865	-0.930649	-0.644772	0.348406	-0.910664	0.397456	-0.433735	-0.805189
	LF_2_Hydroxyisovaleric_acid	-0.931798	-0.920202	-0.463128	-0.226209	0.0932773	-0.468792	-0.0948224	-0.400961	-0.718422	0.125598
	LF_4_Hydroxyphenyllactic_acid	-0.8443	-0.793997	-0.122697	0.101943	0.488145	-0.223212	0.233641	-0.161511	-0.353085	0.0802372
	LF_Sorbitol	-0.753406	-0.688386	0.0576142	0.238823	0.637592	-0.0776325	0.361947	-0.0222333	-0.155389	0.0348095
	The data of H_coagulans group
	Pearson	LV_Oxalic_acid	LV_2_Aminoisobutyric_acid	LV_Glucose_6_phosphate	LV_Erythrulose	LV_3_Hydroxyglutaric_acid	LV_Glucose	LV_2_Ketobutyric_acid	LV_Glucono_1_5_lactone	LV_Nonanoic_acid	LV_Sarcosine
	LF_3_Hydroxypropionic_acid	-0.0833424	-0.0597503	0.0569536	-0.216186	-0.118391	0.215501	-0.0938319	0.288745	0.791403	0.194497
	LF_Mannitol	0.659119	0.668251	0.121284	0.67768	0.724723	0.751719	0.776359	0.783605	0.94617	0.917704
	LF_Adenine	-0.280021	-0.256239	0.00712989	-0.425425	-0.330727	0.0284767	-0.309951	0.102653	0.637297	-0.0264919
	LF_Sebacic_acid	0.924687	0.928253	0.395501	0.904334	0.946171	0.930546	0.916255	0.9311	0.748773	0.986058
	LF_Lactitol	0.591563	0.612536	0.671942	0.342615	0.468814	0.818287	0.342154	0.854907	0.823189	0.597743
	LF_Maltitol	0.59586	0.581316	-0.269609	0.850749	0.77961	0.4034	0.910071	0.379999	0.311178	0.773202
	LF_Acetylglycine	0.0917549	0.0879405	-0.657234	0.369721	0.316813	0.061793	0.554669	0.0903468	0.566897	0.548235
	LF_Galactose	-0.205172	-0.181674	0.540919	-0.539022	-0.414214	0.0806031	-0.577607	0.122493	0.201526	-0.323697
	LF_3_Hydroxyisobutyric_acid	-0.289387	-0.265261	0.0372324	-0.449032	-0.351254	0.0227753	-0.341562	0.0961315	0.612563	-0.0559464
	LF_Cytidine	0.574052	0.563794	-0.298633	0.818616	0.762932	0.437325	0.911261	0.429525	0.48504	0.828629
	LF_Succinic_acid	-0.486517	-0.466247	-0.236808	-0.557377	-0.491947	-0.208701	-0.414795	-0.134167	0.509566	-0.17227
	LF_Glucaric_acid	0.460573	0.448639	-0.424488	0.741949	0.67168	0.309942	0.848627	0.302682	0.417177	0.746233
	LF_3_Hydroxybutyric_acid	-0.329648	-0.305837	0.009763	-0.48387	-0.389155	-0.0194505	-0.374846	0.053972	0.583265	-0.0937164
	LF_Ornithine	-0.941054	-0.931955	-0.46297	-0.950644	-0.94551	-0.784183	-0.863962	-0.739076	-0.201252	-0.772056
	LF_Pyridoxal	-0.0975322	-0.0748879	0.654878	-0.454064	-0.325564	0.17072	-0.519789	0.204366	0.174342	-0.277457
	LF_Trehalose	0.472097	0.481856	-0.0711477	0.531547	0.569046	0.584124	0.670272	0.627167	0.954206	0.820671
	LF_Lysine	0.339683	0.317502	-0.448868	0.654223	0.540713	0.0637653	0.689185	0.0224988	-0.093568	0.453521
	LF_2_Hydroxyisobutyric_acid	-0.248412	-0.224488	0.022942	-0.395463	-0.299119	0.0604744	-0.280142	0.134598	0.661547	0.0058346
	LF_Inositol	0.996076	0.993475	0.551371	0.953772	0.98017	0.916957	0.888017	0.888691	0.433314	0.875445
	LF_4_Aminobutyric_acid	0.99219	0.995127	0.652347	0.888109	0.942608	0.979979	0.826481	0.963807	0.552998	0.877496
	LF_Tryptamine	0.522327	0.511411	-0.357735	0.783887	0.721877	0.380647	0.884117	0.373545	0.459906	0.793892
	LF_Sucrose	0.0777412	0.0783374	-0.598831	0.31311	0.281256	0.102084	0.506707	0.141455	0.671426	0.551589
	LF_Tagatose	-0.107319	-0.0864071	0.683161	-0.468805	-0.345689	0.138408	-0.555183	0.164484	0.06868	-0.336655
	LF_2_Hydroxyisovaleric_acid	-0.0316269	-0.0223743	0.753316	-0.359167	-0.278522	0.0622966	-0.531615	0.0466903	-0.378613	-0.459302
	LF_4_Hydroxyphenyllactic_acid	0.240252	0.26573	0.606372	-0.0573411	0.0814378	0.536138	-0.0507921	0.586746	0.690644	0.247009
	LF_Sorbitol	0.709069	0.691189	-0.0142489	0.899182	0.829958	0.463052	0.873644	0.414715	0.0581903	0.68647
	3. Enrichiment analysis
	The comparison between N_control and H_control (N_control > H_control)
	Query	Match	HMDB	PubChem	KEGG	SMILES	Comment
	Pyrogallol	1,2,3-Trihydroxybenzene	HMDB0013674	3446	C01108	C1=CC(=C(C(=C1)O)O)O	1
	Serine	Serine	HMDB0062263	5951	C00716	N[C@@H](CO)C(O)=O	1
	N-Acetylmannosamine	N-Acetylmannosamine	HMDB0001129	11096158	C00645	CC(=O)N[C@H]1[C@H]([C@@H]([C@H](O[C@H]1O)CO)O)O	1
	4_Hydroxyproline	4-Hydroxyproline	HMDB0000725	5810	C01157	C1[C@H](CN[C@@H]1C(=O)O)O	1
	Cystamine	NA	NA	NA	NA	NA	0
	Glycine	Glycine	HMDB0000123	750	C00037	C(C(=O)O)N	1
	Proline	L-Proline	HMDB0000162	145742	C00148	C1C[C@H](NC1)C(=O)O	1
	Tryptophan	L-Tryptophan	HMDB0000929	6305	C00078	C1=CC=C2C(=C1)C(=CN2)C[C@@H](C(=O)O)N	1
	Alanine	L-Alanine	HMDB0000161	5950	C00041	C[C@@H](C(=O)O)N	1
	Glycerol	Glycerol	HMDB0000131	753	C00116	C(C(CO)O)O	1
	Valine	L-Valine	HMDB0000883	6287	C00183	CC(C)[C@@H](C(=O)O)N	1
	Arginine	L-Arginine	HMDB0000517	6322	C00062	C(C[C@@H](C(=O)O)N)CN=C(N)N	1
	Leucine	L-Leucine	HMDB0000687	6106	C00123	CC(C)C[C@@H](C(=O)O)N	1
	Threonine	L-Threonine	HMDB0000167	6288	C00188	C[C@H]([C@@H](C(=O)O)N)O	1
	1_6_Anhydroglucose	Levoglucosan	HMDB0000640	2724705	NA	C1[C@@H]2[C@H]([C@@H]([C@H]([C@H](O1)O2)O)O)O	1
	Urea	Urea	HMDB0000294	2447	C00086	C(=O)(N)N	1
	Fumaric_acid	Fumaric acid	HMDB0000134	444972	C00122	C(=C/C(=O)O)\C(=O)O	1
	Lyxose	Pectin	HMDB0003402	65550	C08348	[C@@H]1([C@H]([C@H](O[C@H]([C@@H]1O)O)C(=O)O)O)O	1
	Cytosine	Cytosine	HMDB0000630	597	C00380	C1=C(NC(=O)N=C1)N	1
	Histidine	L-Histidine	HMDB0000177	6274	C00135	C1=C(NC=N1)C[C@@H](C(=O)O)N	1
	Hydroquinone	Hydroquinone	HMDB0002434	785	C00530	C1=CC(=CC=C1O)O	1
	Methionine	L-Methionine	HMDB0000696	6137	C00073	CSCC[C@@H](C(=O)O)N	1
	3_Methoxy_4_hydroxybenzoic_acid	NA	NA	NA	NA	NA	0
	Tyrosine	L-Tyrosine	HMDB0000158	6057	C00082	C1=CC(=CC=C1C[C@@H](C(=O)O)N)O	1
	Ribitol	Ribitol	HMDB0000508	NA	C00474	OC[C@H](O)[C@H](O)[C@H](O)CO	1
	Galactitol	Galactitol	HMDB0000107	11850	C01697	C([C@H]([C@@H]([C@@H]([C@H](CO)O)O)O)O)O	1
	Phenylalanine	L-Phenylalanine	HMDB0000159	6140	C00079	C1=CC=C(C=C1)C[C@@H](C(=O)O)N	1
	Cystine	L-Cystine	HMDB0000192	67678	C00491	C([C@@H](C(=O)O)N)SSC[C@@H](C(=O)O)N	1
	3_Aminoisobutyric_acid	3-Aminoisobutanoic acid	HMDB0003911	64956	C05145	CC(CN)C(=O)O	1
	Allose	Allose	HMDB0001151	12285879	C01487	C([C@H]1[C@@H]([C@@H]([C@@H](C(O1)O)O)O)O)O	1
	3_Aminopropanoic_acid	Beta-Alanine	HMDB0000056	239	C00099	C(CN)C(=O)O	1
	Lysine	L-Lysine	HMDB0000182	5962	C00047	C(CCN)C[C@@H](C(=O)O)N	1
	Aspartic_acid	L-Aspartic acid	HMDB0000191	5960	C00049	C([C@@H](C(=O)O)N)C(=O)O	1
	3_Aminoglutaric_acid	NA	NA	NA	NA	NA	0
	2_Aminoethanol	Ethanolamine	HMDB0000149	700	C00189	C(CO)N	1
	Uracil	Uracil	HMDB0000300	1174	C00106	C1=CNC(=O)NC1=O	1
	Methylmalonic_acid	Methylmalonic acid	HMDB0000202	487	C02170	CC(C(=O)O)C(=O)O	1
	Glyceric_acid	Glyceric acid	HMDB0000139	439194	C00258	C([C@H](C(=O)O)O)O	1
	Sorbose	L-Sorbose	HMDB0001266	441484	C08356	C1[C@@H]([C@H]([C@@H]([C@](O1)(CO)O)O)O)O	1
	Cysteine	L-Cysteine	HMDB0000574	5862	C00097	C([C@@H](C(=O)O)N)S	1
	Xylitol	D-Xylitol	HMDB0002917	6912	C00379	C([C@H](C([C@H](CO)O)O)O)O	1
	Glyoxylic_acid	Glyoxylic acid	HMDB0000119	760	C00048	C(=O)C(=O)O	1
	Psicose	NA	NA	NA	NA	NA	0
	Creatinine	Creatinine	HMDB0000562	588	C00791	CN1CC(=O)N=C1N	1
	Glyceraldehyde	Glyceraldehyde	HMDB0001051	751	C02154	C(C(C=O)O)O	1
	Fructose	D-Fructose	HMDB0000660	439709	C02336	C([C@@H]1[C@H]([C@@H]([C@](O1)(CO)O)O)O)O	1
	Glucose	D-Glucose	HMDB0000122	5793	C00221	C([C@@H]1[C@H]([C@@H]([C@H](C(O1)O)O)O)O)O	1
	Glucono_1_5_lactone	Gluconolactone	HMDB0000150	7027	C00198	C([C@@H]1[C@H]([C@@H]([C@H](C(=O)O1)O)O)O)O	1
	The comparison between H_control and H_coagulans (H_coagulans > H_control)
	Query	Match	HMDB	PubChem	KEGG	SMILES	Comment
	Sebacic_acid	NA	NA	NA	NA	NA	0
	Lactitol	NA	NA	NA	NA	NA	0
	Galactose	D-Galactose	HMDB0000143	439357	C00984	C([C@@H]1[C@@H]([C@@H]([C@H]([C@H](O1)O)O)O)O)O	1
	Glucaric_acid	Glutaric acid	HMDB0000661	743	C00489	C(CC(=O)O)CC(=O)O	1
	Pyridoxal	Pyridoxal	HMDB0001545	1050	C00250	CC1=NC=C(C(=C1O)C=O)CO	1
	Trehalose	Trehalose	HMDB0000975	7427	C01083	C([C@@H]1[C@H]([C@@H]([C@H]([C@H](O1)O[C@@H]2[C@@H]([C@H]([C@@H]([C@H](O2)CO)O)O)O)O)O)O)O	1
	Tryptamine	Tryptamine	HMDB0000303	1150	C00398	C1=CC=C2C(=C1)C(=CN2)CCN	1
	Sucrose	Sucrose	HMDB0000258	5988	C00089	C([C@@H]1[C@H]([C@@H]([C@H]([C@H](O1)O[C@]2([C@H]([C@@H]([C@H](O2)CO)O)O)CO)O)O)O)O	1
	Pyridoxine	Pyridoxine	HMDB0000239	1054	C00314	CC1=NC=C(C(=C1O)CO)CO	1
	Tagatose	D-Tagatose	HMDB0003418	92092	C00795	C([C@H]([C@@H]([C@@H](C(=O)CO)O)O)O)O	1
	Sorbitol	Sorbitol	HMDB0000247	5780	C00794	C([C@H]([C@H]([C@@H]([C@H](CO)O)O)O)O)O	1
	Glucosamine	Glucosamine	HMDB0001514	439213	C00329	C([C@@H]1[C@H]([C@@H]([C@H](C(O1)O)N)O)O)O	1
	Psicose	NA	NA	NA	NA	NA	0
	Fructose	D-Fructose	HMDB0000660	439709	C02336	C([C@@H]1[C@H]([C@@H]([C@](O1)(CO)O)O)O)O	1
	Glucose_6_phosphate	NA	NA	NA	NA	NA	0
	Fructose_6_phosphate	Fructose 6-phosphate	HMDB0000124	69507	C00085	C([C@H]([C@H]([C@@H](C(=O)CO)O)O)O)OP(=O)(O)O	1
	Galactosamine	N-Acetylgalactosamine	HMDB0000212	84265	C01074	CC(=O)N[C@@H]1[C@H]([C@H]([C@H](O[C@@H]1O)CO)O)O	1
	Ascorbic_acid	Ascorbic acid	HMDB0000044	54670067	C01041	C([C@@H]([C@@H]1C(=C(C(=O)O1)O)O)O)O	1
	Fructose_1_phosphate	Fructose 1-phosphate	HMDB0001076	10400369	C01094	C([C@@H]1[C@H]([C@@H]([C@](O1)(COP(=O)(O)O)O)O)O)O	1
	Mannose_6_phosphate	Mannose 6-phosphate	HMDB0001078	439198	C00275	C([C@@H]1[C@H]([C@@H]([C@@H]([C@@H](O1)O)O)O)O)OP(=O)(O)O	1
	Malonic_acid	Malonic acid	HMDB0000691	867	C04025	C(C(=O)O)C(=O)O	1
	Inosine	Inosine	HMDB0000195	6021	C00294	C1=NC(=O)C2=C(N1)N(C=N2)[C@H]3[C@@H]([C@@H]([C@H](O3)CO)O)O	1
	Citric_acid	Citric acid	HMDB0000094	311	C00158	C(C(=O)O)C(CC(=O)O)(C(=O)O)O	1
	Gluconic_acid	Gluconic acid	HMDB0000625	10690	C00257	C([C@H]([C@H]([C@@H]([C@H](C(=O)O)O)O)O)O)O	1
	2_Aminopimelic_acid	NA	NA	NA	NA	NA	0
	5_Dehydroquinic_acid	NA	NA	NA	NA	NA	0
	Glucose	D-Glucose	HMDB0000122	5793	C00221	C([C@@H]1[C@H]([C@@H]([C@H](C(O1)O)O)O)O)O	1
	4.Feature extraction with machine learning
	Prediction by randomforest
		H_Control	H_Test	N_Control
	H_Control	4	0	0
	H_Test	0	4	0
	N_Control	0	0	4
	Feature extraction by randomforest
		MeanDecreaseAccuracy	MeanDecreaseGini
	LF_3_Hydroxypropionic_acid	1.25862	0.093946
	LV_Oxalic_acid	2.69603	0.266194
	LV_2_Aminoisobutyric_acid	3.19349	0.23093
	LF_Mannitol	5.02444	0.495244
	LF_Adenine	1.80848	0.0966016
	LF_Sebacic_acid	4.72024	0.30196
	LF_Lactitol	1.48787	0.186267
	LF_Maltitol	3.606	0.215782
	LF_Acetylglycine	4.5003	0.329117
	LF_Galactose	-0.660195	0.0698429
	LV_Glucose_6_phosphate	4.45059	0.396287
	LV_Erythrulose	1.762	0.085619
	LF_3_Hydroxyisobutyric_acid	1.31703	0.1205
	LF_Cytidine	1.58699	0.22393
	LV_3_Hydroxyglutaric_acid	2.43146	0.112543
	LF_Succinic_acid	1.36266	0.139395
	LF_Glucaric_acid	0.815165	0.117667
	LF_3_Hydroxybutyric_acid	1.57069	0.0824587
	LF_Ornithine	3.27425	0.304335
	LF_Pyridoxal	4.64084	0.414565
	LF_Trehalose	0.577209	0.185697
	LF_Lysine	4.0501	0.329097
	LF_2_Hydroxyisobutyric_acid	2.90877	0.181698
	LF_Inositol	-0.0975909	0.0635952
	LV_Glucose	-0.0759194	0.0370143
	LV_2_Ketobutyric_acid	-0.318032	0.0597048
	LV_Glucono_1_5_lactone	0.585406	0.0702048
	LF_4_Aminobutyric_acid	4.80118	0.502595
	LF_Tryptamine	2.33763	0.191024
	LF_Sucrose	2.54847	0.223824
	LV_Nonanoic_acid	1.48442	0.206687
	LV_Sarcosine	-0.871849	0.0471524
	LF_Tagatose	5.33235	0.484121
	LF_2_Hydroxyisovaleric_acid	0.355513	0.078581
	LF_4_Hydroxyphenyllactic_acid	3.11194	0.279733
	LF_Sorbitol	2.61054	0.180419
	Prediction by XGboost
		H_Control	H_Test	N_Control
	H_Control	4	0	0
	H_Test	0	4	0
	N_Control	0	0	4
	Feature extraction by Xgboost
	Feature	Gain	Cover	Frequency	Importance
	LV_Oxalic_acid	0.333333	0.333333	0.333333	0.333333
	LF_Mannitol	0.333333	0.333333	0.333333	0.333333
	LF_Pyridoxal	0.333333	0.333333	0.333333	0.333333
	5. Raw data table for structure equations and causal inference
	W_coag indicates the heat-stress test group
	Heat	Growth	W_coag	LV_Oxalic_acid	LF_Mannitol	LF_Pyridoxal
	0	1	0	3.82683	0.150621	0
	0	1	0	3.98978	0.0724486	0
	0	1	0	4.81941	7.87571	0
	0	1	0	4.47421	0.0626622	0
	1	0	0	4.27027	0	0.0396651
	1	0	0	4.47339	0	0.0076431
	1	0	0	3.94746	0	0.107552
	1	0	0	4.44666	0	0.0511803
	1	1	1	2.6229	13.4723	0.0900869
	1	1	1	2.70881	9.79703	0.322995
	1	1	1	3.41569	21.926	0.18573
	1	1	1	2.75176	21.0548	0.287608
	6. Raw signal data of immunoblotting
	Group	total protein conc. (mg/mL)	TRPA1	GAPDH	TRPA1/GAPDH	HIF	GAPDH	HIF/GAPDH
	H_control_1	27.4578	14200	15200	0.934211	11400	12300	0.926829
	H_control_2	20.5036	9770	12300	0.794309	9190	8740	1.05149
	H_control_3	32.796	6490	9840	0.659553	4850	8710	0.556831
	H_control_4	25.2622	6060	5890	1.02886	5870	7820	0.750639
	H_control_1	28.2496	4990	3430	1.45481	8100	5410	1.49723
	H_control_2	42.697	4800	5840	0.821918	10600	5800	1.82759
	H_control_3	31.3758	182	6250	0.02912	8380	5820	1.43986
	H_control_4	27.768	2750	8790	0.312856	6830	5380	1.26952
	H_coagulans_1	33.5552	293	9160	0.0319869	5440	5120	1.0625
	H_coagulans_2	29.5312	1680	10500	0.16	2720	5700	0.477193
	H_coagulans_3	31.3676	2980	8820	0.337868	5280	3780	1.39683
	H_coagulans_4	30.2086	11300	4500	2.51111	9710	4560	2.12939
	7. Raw data of MDA contents
	liver
	Group	MDA content (uM)	Average (uM)	SE
	H_control_1	9.01939	8.81158	0.295903
	H_control_2	9.51327
	H_control_3	8.13148
	H_control_4	8.58218
	H_control_1	7.79953	7.64705	0.449377
	H_control_2	7.27596
	H_control_3	8.81428
	H_control_4	6.69842
	H_coagulans_1	6.89543	7.46488	0.553194
	H_coagulans_2	6.36647
	H_coagulans_3	8.91144
	H_coagulans_4	7.68618
	white adipocyte tissue
	Group	MDA content (uM)	Average (uM)	SE
	H_control_1	0.314159	0.409029	0.0340174
	H_control_2	0.421782
	H_control_3	0.424092
	H_control_4	0.476084
	H_control_1	0.330159	0.786203	0.287831
	H_control_2	0.610315
	H_control_3	0.57511
	H_control_4	1.62923
	H_coagulans_1	0.910256	1.14048	0.118518
	H_coagulans_2	1.27941
	H_coagulans_3	0.971546
	H_coagulans_4	1.4007

## Sheet: Bacterial population
	1. Bacterial population (Detected number per 3000 reads)
	Abberivations indicate as follows: H_control, normal temperature (non-heat stress) group; H_control, Heat stress control group; H_coagulans, Heat stress test group with W. coagulans)
	Category	Bacteria_name	H_control_1	H_control_2	H_control_3	H_control_1	H_control_2	H_control_3	H_coagulans_1	H_coagulans_2	H_coagulans_3	H_coagulans_4
	genus	Romboutsia	0	1	37	18	6	2	811	504	287	175
	genus	Pseudomonas	0	0	0	1	1	0	0	0	0	0
	genus	Flavonifractor	0	0	0	0	1	1	1	2	3	1
	genus	Lactobacillus	2910	2295	2858	2417	2070	2054	1780	462	807	2401
	genus	Bifidobacterium	1	0	0	0	0	0	0	1	0	1
	genus	Staphylococcus	0	1	0	0	0	0	2	0	0	1
	genus	Corynebacterium	0	0	0	0	0	1	1	0	2	1
	genus	Brevundimonas	4	9	0	6	0	0	0	0	0	0
	genus	Ralstonia	0	4	0	3	0	0	0	0	0	0
	genus	Anaerotruncus	0	0	0	0	0	2	0	0	0	0
	genus	Methylobacterium	0	0	0	0	1	0	0	0	0	0
	genus	Collinsella	0	0	0	1	0	0	0	0	0	0
	genus	Anoxybacillus	0	0	0	1	0	0	0	0	0	0
	genus	Coprococcus	0	0	0	1	0	0	0	0	0	0
	genus	Escherichia	0	0	0	5	0	2	0	2	1	0
	genus	Roseburia	0	0	0	2	5	7	5	18	17	2
	genus	Arthrobacter	6	15	0	34	4	4	1	0	0	0
	genus	Turicibacter	0	0	0	0	0	0	24	186	14	4
	genus	Anaerostipes	0	0	0	2	7	3	1	19	35	0
	genus	Clostridium	1	60	10	27	34	37	24	75	174	21
	genus	Akkermansia	0	0	0	0	0	0	0	6	0	1
	genus	Enterococcus	0	2	1	0	0	0	27	0	3	1
	genus	Burkholderia	4	16	1	45	5	0	0	0	0	1
	genus	Microbacterium	2	0	0	0	0	0	0	0	0	1
	genus	Gordonibacter	0	0	0	0	0	0	0	0	2	0
	genus	Klebsiella	0	0	0	0	0	0	0	0	1	0
	genus	Denitrobacterium	0	0	0	0	0	0	0	0	1	0
	genus	Massilia	0	5	0	10	0	0	1	0	0	1
	genus	Desulfotomaculum	0	0	0	0	0	2	1	0	2	2
	genus	Undefined	25	532	83	374	736	765	289	1592	1411	352
	genus	Dorea	0	0	0	1	0	0	0	2	0	1
	genus	Sorghum	13	4	0	1	3	0	2	3	0	3
	genus	Subdoligranulum	0	0	1	1	15	6	1	3	12	3
	genus	Pseudoflavonifractor	0	1	0	3	1	8	0	10	19	0
	genus	Eubacterium	0	1	0	0	1	1	0	0	7	0
	genus	Butyricicoccus	0	0	1	9	0	1	0	3	6	0
	genus	Ruminococcus	1	1	0	11	20	36	2	21	47	1
	genus	Blautia	1	15	3	16	56	23	5	42	101	13
	genus	Oscillibacter	0	0	0	0	0	1	0	0	2	0
	genus	Phaseolus	28	22	0	9	6	4	16	6	1	6
	genus	Faecalibacterium	0	7	0	2	28	40	6	43	45	7
	genus	Streptococcus	0	0	1	0	0	0	0	0	0	0
	genus	Weissella	0	0	0	0	0	0	0	0	0	0
	genus	Rothia	0	0	0	0	0	0	0	0	0	0
	genus	Rikenella	0	3	2	0	0	0	0	0	0	0
	genus	Alistipes	0	0	0	0	0	0	0	0	0	0
	genus	Brevibacterium	0	0	0	0	0	0	0	0	0	0
	genus	Odoribacter	0	0	1	0	0	0	0	0	0	0
	genus	Barnesiella	0	0	0	0	0	0	0	0	0	0
	genus	Bradyrhizobium	1	2	0	0	0	0	0	0	0	0
	genus	Bacteroides	0	0	0	0	0	0	0	0	0	0
	genus	Prevotella	2	0	0	0	0	0	0	0	0	0
	genus	Brachybacterium	0	0	0	0	0	0	0	0	0	0
	genus	Leuconostoc	0	0	0	0	0	0	0	0	0	0
	genus	Agrostis	0	1	0	0	0	0	0	0	0	0
	genus	Leucobacter	0	0	0	0	0	0	0	0	0	0
	genus	Aerococcus	0	0	0	0	0	0	0	0	0	0
	genus	Bacillus	0	0	0	0	0	0	0	0	0	0
	genus	Caulobacter	1	0	0	0	0	0	0	0	0	0
	genus	Eggerthella	0	2	0	0	0	0	0	0	0	0
	genus	Gemella	0	0	0	0	0	0	0	0	0	0
	genus	Listeria	0	0	0	0	0	0	0	0	0	0
	genus	Methylocystis	0	0	0	0	0	0	0	0	0	0
	genus	Neisseria	0	0	0	0	0	0	0	0	0	0
	genus	Plantibacter	0	0	0	0	0	0	0	0	0	0
	genus	Shigella	0	0	0	0	0	0	0	0	0	0
	genus	Actinomyces	0	0	0	0	0	0	0	0	0	0
	genus	Aneurinibacillus	0	0	0	0	0	0	0	0	0	0
	genus	Catenibacterium	0	0	0	0	0	0	0	0	0	0
	genus	Clavibacter	0	0	0	0	0	0	0	0	0	0
	genus	Coprobacillus	0	1	0	0	0	0	0	0	0	0
	genus	Curtobacterium	0	0	0	0	0	0	0	0	0	0
	genus	Deinococcus	0	0	0	0	0	0	0	0	0	0
	genus	Enhydrobacter	0	0	1	0	0	0	0	0	0	0
	genus	Globicatella	0	0	0	0	0	0	0	0	0	0
	genus	Granulicatella	0	0	0	0	0	0	0	0	0	0
	genus	Haemophilus	0	0	0	0	0	0	0	0	0	0
	genus	Helicobacter	0	0	0	0	0	0	0	0	0	0
	genus	Kocuria	0	0	0	0	0	0	0	0	0	0
	genus	Lachnobacterium	0	0	0	0	0	0	0	0	0	0
	genus	Megamonas	0	0	0	0	0	0	0	0	0	0
	genus	Parabacteroides	0	0	0	0	0	0	0	0	0	0
	genus	Parasutterella	0	0	0	0	0	0	0	0	0	0
	genus	Phyllobacterium	0	0	0	0	0	0	0	0	0	0
	genus	Rhodococcus	0	0	0	0	0	0	0	0	0	0
	genus	Roseomonas	0	0	0	0	0	0	0	0	0	0
	genus	Sanguibacter	0	0	0	0	0	0	0	0	0	0
	genus	Sphingomonas	0	0	0	0	0	0	0	0	0	0
	genus	Streptomyces	0	0	0	0	0	0	0	0	0	0
	genus	TM7	0	0	0	0	0	0	0	0	0	0
	phylum	Actinobacteria	9	24	3	44	16	14	6	13	22	6
	phylum	Cyanobacteria	0	0	0	0	0	0	0	2	0	1
	phylum	Verrucomicrobia	0	0	0	0	0	0	0	6	0	1
	phylum	Firmicutes	2917	2894	2986	2866	2956	2963	2972	2921	2967	2971
	phylum	Proteobacteria	10	37	2	70	7	8	1	17	2	2
	phylum	Bacteroidetes	22	10	8	0	0	0	0	0	1	0
	phylum	Streptophyta	41	27	0	10	9	4	18	9	1	9
	phylum	Tenericutes	0	3	1	10	12	10	3	32	7	9
	phylum	Undefined	1	5	0	0	0	1	0	0	0	1
	phylum	Deinococcus-Thermus	0	0	0	0	0	0	0	0	0	0
	phylum	TM7	0	0	0	0	0	0	0	0	0	0
	2. α-diversity
	index		H_control_1	H_control_2	H_control_3	H_control_1	H_control_2	H_control_3	H_coagulans_1	H_coagulans_2	H_coagulans_3	H_coagulans_4
	Number of OTUs		34	184	75	149	167	253	118	268	260	142
	chao1		47	259	165.083	270.714	279	370.549	232.375	357.204	373.561	385.077
	ACE		55.9	278.382	209.414	264.817	239.536	399.872	220.837	367.338	387.62	306.62
	shannon's index		1.69453	2.64016	1.63777	2.1814	2.52249	2.84583	2.20044	3.99138	4.12377	2.22268
	3. β-diversity
	UniFrac PCoA P1 vs P2 (Unweighted)
	pc vector number	1	2	3	4	5	6	7	8	9	10
	H_control_1	0.598009	0.26348	0.0405041	0.00185292	0.0512004	-0.00560101	0.0050628	-0.00053206	0.0104367	0
	H_control_2	0.025693	0.00913145	-0.282501	-0.0019859	-0.198913	0.100215	0.0880379	-0.0329026	-0.0374859	0
	H_control_3	0.297894	-0.385934	-0.0479935	-0.0713431	0.114019	-0.0356705	-0.0093555	-0.00454727	-0.0180095	0
	H_control_1	-0.133373	0.0571369	0.0372073	-0.150501	-0.128043	-0.25015	-0.0152597	-0.0210178	-0.0550777	0
	H_control_2	-0.129692	0.0268662	0.0214785	-0.219013	-0.0278836	0.11786	-0.134527	0.0640473	0.131292	0
	H_control_3	-0.194732	0.0718875	-0.0765104	0.0704401	0.140236	-0.0036112	-0.00498218	0.195036	-0.106716	0
	H_coagulans_1	-0.0237267	-0.0922341	0.273795	0.0576577	-0.131935	0.0709381	0.15248	0.0577691	0.00030073	0
	H_coagulans_2	-0.198796	0.0315276	-0.0723771	0.103234	0.127604	-0.0858249	0.118652	-0.0460294	0.175694	0
	H_coagulans_3	-0.221364	0.0659566	0.077393	-0.057089	0.146695	0.103896	-0.00131953	-0.168793	-0.108819	0
	H_coagulans_4	-0.0199118	-0.0478189	0.029004	0.266749	-0.0929805	-0.0120519	-0.198789	-0.0430307	0.00838519	0
	eigvals	0.609026	0.243742	0.178484	0.169072	0.155881	0.111164	0.103066	0.079485	0.0762781	0
	% variation explained	0.352814	0.141202	0.103397	0.0979448	0.0903031	0.0643979	0.059707	0.0460463	0.0441885	0
	UniFrac distance (Unweighted)
		H_control_1	H_control_2	H_control_3	H_control_1	H_control_2	H_control_3	H_coagulans_1	H_coagulans_2	H_coagulans_3	H_coagulans_4
	H_control_1	0	0.761951	0.728616	0.83533	0.833329	0.862292	0.79703	0.875372	0.882556	0.783091
	H_control_2	0.761951	0	0.645782	0.539237	0.530044	0.539821	0.58727	0.542125	0.589766	0.531864
	H_control_3	0.728616	0.645782	0	0.708592	0.682816	0.722934	0.641994	0.714404	0.738642	0.645775
	H_control_1	0.83533	0.539237	0.708592	0	0.455553	0.497931	0.523604	0.495477	0.493873	0.542373
	H_control_2	0.833329	0.530044	0.682816	0.455553	0	0.482959	0.527469	0.511176	0.446724	0.552691
	H_control_3	0.862292	0.539821	0.722934	0.497931	0.482959	0	0.56016	0.403497	0.429748	0.506467
	H_coagulans_1	0.79703	0.58727	0.641994	0.523604	0.527469	0.56016	0	0.549995	0.530507	0.497644
	H_coagulans_2	0.875372	0.542125	0.714404	0.495477	0.511176	0.403497	0.549995	0	0.443395	0.508115
	H_coagulans_3	0.882556	0.589766	0.738642	0.493873	0.446724	0.429748	0.530507	0.443395	0	0.547883
	H_coagulans_4	0.783091	0.531864	0.645775	0.542373	0.552691	0.506467	0.497644	0.508115	0.547883	0
	UniFrac PCoA P1 vs P2 (Weighted)
	pc vector number	1	2	3	4	5	6	7	8	9	10
	H_control_1	-0.262452	-0.0872693	-0.0437836	0.00521081	-0.00772524	0.0306657	0.00714603	-0.00786592	0	0
	H_control_2	-0.0964216	0.0625353	-0.00334628	0.0283908	-0.065741	-0.00341027	-0.0150027	-0.00128725	0	0
	H_control_3	-0.238626	-0.148222	-0.0641377	-0.000513343	0.0170457	-0.0183163	-0.00713777	0.00450733	0	0
	H_control_1	-0.113339	0.109249	0.000770867	0.00287854	0.0349159	-0.0250143	-0.0155029	-0.0153346	0	0
	H_control_2	-0.00944263	0.097465	-0.0222028	0.00628055	0.0246841	0.0332741	-0.0101216	0.0211165	0	0
	H_control_3	0.00288044	0.0880191	-0.0361228	0.0306714	0.00495765	0.00441221	0.0300916	-0.00934688	0	0
	H_coagulans_1	0.03562	-0.0528894	0.187915	-0.0194645	0.00636095	0.016836	-0.00271226	-0.00703482	0	0
	H_coagulans_2	0.435114	-0.0743008	-0.00584897	0.0885209	0.00397757	-0.00929407	-0.00146362	0.00257018	0	0
	H_coagulans_3	0.346554	-0.00994767	-0.0730409	-0.106901	-0.00879265	0.00301807	-0.00226593	-0.00498683	0	0
	H_coagulans_4	-0.0998858	0.0153606	0.0597969	-0.0350742	-0.00968295	-0.0321712	0.0169692	0.0176623	0	0
	eigvals	0.468734	0.0713313	0.0520973	0.0226947	0.00675247	0.00445377	0.00187797	0.00124519	0	0
	% variation explained	0.744984	0.113371	0.082801	0.03607	0.0107321	0.00707862	0.00298477	0.00197904	0	0
	UniFrac distance (Weighted)
		H_control_1	H_control_2	H_control_3	H_control_1	H_control_2	H_control_3	H_coagulans_1	H_coagulans_2	H_coagulans_3	H_coagulans_4
	H_control_1	0	0.236527	0.0734816	0.260974	0.315967	0.317621	0.378516	0.704813	0.624763	0.232101
	H_control_2	0.236527	0	0.275841	0.11615	0.140193	0.136371	0.274611	0.556437	0.477546	0.122571
	H_control_3	0.0734816	0.275841	0	0.2927	0.342435	0.343685	0.386689	0.685424	0.611269	0.250239
	H_control_1	0.260974	0.11615	0.2927	0	0.126778	0.137337	0.293622	0.586162	0.495983	0.134516
	H_control_2	0.315967	0.140193	0.342435	0.126778	0	0.067099	0.266153	0.486452	0.395524	0.170872
	H_control_3	0.317621	0.136371	0.343685	0.137337	0.067099	0	0.273476	0.466699	0.385841	0.174632
	H_coagulans_1	0.378516	0.274611	0.386689	0.293622	0.266153	0.273476	0	0.457783	0.417831	0.206376
	H_coagulans_2	0.704813	0.556437	0.685424	0.586162	0.486452	0.466699	0.457783	0	0.234376	0.561335
	H_coagulans_3	0.624763	0.477546	0.611269	0.495983	0.395524	0.385841	0.417831	0.234376	0	0.473913
	H_coagulans_4	0.232101	0.122571	0.250239	0.134516	0.170872	0.174632	0.206376	0.561335	0.473913	0
	4. Raw data table for structure equations and causal inference
	W_coag indicates the heat-stress test group
	Heat	Growth	W_coag	Romboutsia	Pseudomonas	Flavonifractor	Lactobacillus
	0	1	0	0	0	0	97
	0	1	0	0.0333333	0	0	76.5
	0	1	0	1.23333	0	0	95.2667
	1	0	0	0.6	0.0333333	0	80.5667
	1	0	0	0.2	0.0333333	0.0333333	69
	1	0	0	0.0666667	0	0.0333333	68.4667
	1	1	1	27.0333	0	0.0333333	59.3333
	1	1	1	16.8	0	0.0666667	15.4
	1	1	1	9.56667	0	0.1	26.9
	1	1	1	5.83333	0	0.0333333	80.0333
